1 Host-pathogen transcriptomics of macrophages, Mucorales and their endosymbionts: a  
2 polymicrobial pas de trois

3

4 Authors

5 Poppy Sephton-Clark<sup>1</sup>, Herbert Itabangi<sup>1</sup>, José F Muñoz<sup>2</sup>, Kerstin Voelz<sup>1</sup>, Christina A Cuomo<sup>2</sup>,  
6 Elizabeth R Ballou<sup>1\*</sup>

7

8 <sup>1</sup>*Institute of Microbiology and Infection, School of Biosciences, University of Birmingham,*  
9 *Edgbaston, Birmingham, B15 2TT, UK*

10 <sup>2</sup>*Infectious Disease and Microbiome Program, Broad Institute of MIT and Harvard,*  
11 *Cambridge, Massachusetts, USA*

12 \* To whom correspondence should be addressed

13 ERB: [e.r.ballou@bham.ac.uk](mailto:e.r.ballou@bham.ac.uk)

14

15 Abstract

16

17 Mucorales spores, the causative agents of mucormycosis, interact with the innate immune  
18 system to cause acute, chronic, or resolving infection. Understanding the factors that  
19 influence disease initiation and progression is key to understanding mucormycosis and  
20 developing new treatments. Complicating this, mucormycosis can be caused by a number of  
21 species that span the Mucorales genus and may be host to bacterial endosymbionts. This  
22 study sets out to examine the differences between two species in the Mucorales order by  
23 characterising their differential interactions with the innate immune system, and their  
24 interactions with environmental bacterial endosymbionts. Through a holistic approach, this  
25 study examines the transcriptional responses of *Rhizopus delemar* and *Rhizopus*  
26 *microsporus*, two of the most commonly diagnosed species, to innate immune cells. This  
27 study also examines the immune cell response and assesses the variation in these  
28 responses, given the presence or absence of bacterial endosymbionts within the fungi. We  
29 see that the fungal response is driven by interaction with innate immune cells. The effect of  
30 the bacterial endosymbiont on the fungus is species specific, with a minimal in the absence  
31 of stress, but strongly influencing fungal transcripts during interaction with innate immune  
32 cells. In contrast, we observe that the macrophage response varies depending on the  
33 infecting fungal species, but also depending on endosymbiont status. The most successful  
34 macrophages elicit a pro-inflammatory response, and we see that through germination  
35 inhibition macrophage survival is enhanced. This work reveals species-specific host  
36 responses to related Mucorales spores and shows that bacterial endosymbionts impact the  
37 innate immune cell response.

38

39 Introduction

40

41 Mucormycosis is a devastating, environmentally acquired fungal infection caused by a  
42 variety of Mucorales species. Understanding the interaction between Mucorales spores and  
43 innate immune cells is key to understanding mucormycosis. Studies frequently focus upon  
44 the interaction of a single species of the Mucorales order with innate immune cells (Warris

45 et al. 2005; Chamilos et al. 2008; Schmidt et al. 2013; Kraibooj et al. 2014; Inglesfield et al.  
46 2018). However, between Mucorales species, and across infecting isolates, numerous  
47 phenotypic and genomic differences can be observed (Hoffmann et al. 2013; Mendoza et al.  
48 2014; Schwartze et al. 2014). Whether each species within this family employs the same  
49 mechanism to cause infection remains unclear, however the range of virulence profiles  
50 displayed across the family indicates there may be diversified mechanisms at work (Petraitis  
51 et al. 2013). For example, it has been shown that pathogenicity of these species is linked to  
52 the variable copy number of the gene encoding CotH, a family of cell surface proteins  
53 important for the spores' interactions with and adherence to endothelial cells. Iron-  
54 scavenging and melanisation pathways have also been shown to play a role in pathogenicity  
55 (Chibucos et al. 2016, Andrianaki et al. 2018). In addition to fungal genome plasticity and  
56 transcriptional responses to host stimuli, fungal-host interactions can be further modulated  
57 by bacterial endosymbionts (Itabangi et al., 2019; Partida-Martinez & Hertweck 2005). The  
58 majority of Mucorales species have been shown to harbour bacterial endosymbionts whose  
59 species can vary between Mucorales isolates (Ibrahim et al. 2008; Kobayashi & Crouch 2009;  
60 Mondo et al. 2017; Itabangi et al. 2019). We have recently shown that a bacterial  
61 endosymbiont influences the outcome of *Rhizopus microsporus* infections in both zebrafish  
62 and murine models through modulation of both fungal and phagocyte phenotypes (Itabangi  
63 et al. 2019). However, the impact of endosymbiont on fungal and host transcriptional  
64 response remains unclear.

65

66 While disease can be caused by several species in the Mucorales order, *Rhizopus delemar*  
67 and *Rhizopus microsporus* are responsible for the majority of infections (Liu et al. 2018). Risk  
68 factors for developing the disease include, but are not limited to: innate immune cell  
69 deficiencies, uncontrolled diabetes, immune suppression, skin barrier breaches and iron  
70 overload (Baldin & Ibrahim 2017). With limited antifungal treatments effective against these  
71 invasive infections, there is often a need for surgical debridement or amputation (Spellberg  
72 et al. 2016). In disseminated cases, mucormycosis may present with a mortality rate of over  
73 90% (Mendoza et al. 2014). Reports of chronic mucormycosis have also emerged, affecting  
74 both immunocompromised and immunocompetent patients (Alan et al. 2019). The innate  
75 immune response to Mucorales spores is key to infection control: macrophages are required  
76 to induce a differential immune response on contact with *Rhizopus* spp. and may inhibit  
77 germination or kill hyphal forms upon contact in healthy individuals (Ghuman & Voelz 2017;  
78 Andrianaki et al. 2018). Single and multi-species studies have shown that phagosome  
79 maturation is arrested by melanin within the cell walls of *Aspergillus* spp. and *Rhizopus* spp.,  
80 however iron limitation allows macrophages to more effectively kill *Rhizopus* spp. (Liu et al.  
81 2015; Ibrahim et al. 2010; Andrianaki et al. 2018). Several works comparing *Aspergillus* spp.  
82 to *Rhizopus* spp. have revealed similar immunostimulatory capacities, but differences in  
83 their responses to host stress (Warris et al. 2005; Chamilos et al. 2008; Schmidt et al. 2013;  
84 Kraibooj et al. 2014). Exploring and understanding fungal responses to the host is essential  
85 to improving our understanding of mucormycosis, yet it remains unclear how Mucorales  
86 species respond to, and interact with, the innate immune system, and to what extent this  
87 varies by species.

88

89 Our work explores the interplay between the innate immune system, *R. delemar*, and *R.*  
90 *microsporus* using isolates of both species found to harbour bacterial endosymbionts  
91 (Itabangi et al. 2019). We investigate the differences between these two fungal species, how

92 they respond transcriptionally to innate immune cells, and how their respective bacterial  
93 endosymbionts affect this interaction. We also investigate the transcriptional response of  
94 innate immune cells to these infectious spores and determine how this interaction is  
95 influenced by the presence of an endosymbiont. We reveal a large difference between the  
96 fungal transcriptional profiles of *R. delemar* and *R. microsporus* during *in vitro* monoculture.  
97 There is a small conserved response to exposure to innate immune cells, including key  
98 changes in cell wall genes, consistent with germination. Conversely, we see that the host  
99 innate immune response differs significantly between fungal species and is also influenced  
100 by the presence or lack of an endosymbiont. The innate immune response to *R. delemar* and  
101 *R. microsporus* mirrors the relative aggressiveness of infection between these two species.  
102 We also observe that through the activation of innate immune cells, or upon inhibition of  
103 chitin synthase, we can improve the ability of innate immune cells to control the fungal  
104 spores. Our work represents a broad analysis of the transcriptional interplay between innate  
105 immune responders and infectious Mucorales spores, revealing species-species differences  
106 which question the current model of ‘one species represents all’, when it comes to  
107 mucormycosis.

108

## 109 Results

110

### 111 Experimental Design

112

113 We set out to investigate paired transcriptional responses of host and fungal cells, whilst  
114 also exploring the influence of the endosymbiont on this interaction (Figure 1a). Fungal  
115 spores from *Rhizopus delemar* and *Rhizopus microsporus* were either cured via ciprofloxacin  
116 treatment to remove the bacterial endosymbiont (cured) or maintained in media permissive  
117 to bacterial endosymbiosis (wt). Cured spores were passaged twice in the absence of  
118 ciprofloxacin to limit the impact of the drug on transcriptional responses. The cured and wt  
119 spores of both *R. delemar* and *R. microsporus* were allowed to swell in sabouraud broth  
120 until 95% of the population had reached mid isotropic phase. Due to the differences in  
121 germination rates between the species (Figure 1b), this occurred at 2 hours for *R. delemar*  
122 and 4 hours for *R. microsporus*. Swollen spores were then used to infect the J774.1 murine  
123 macrophage-like cell line. Fungal spores were co-cultured with macrophages for one hour,  
124 after which unengulfed spores were removed, and phagocytosed spores were incubated  
125 within the macrophages for a further two hours. The cells from the resulting infection were  
126 processed to explore their transcriptional response to this infection scenario (Figure 1a).  
127 Macrophages that had phagocytosed fungal spores were isolated and sequenced via the  
128 10X Genomics Chromium Single Cell Sequencing platform. Macrophages left unexposed to  
129 the fungi were used as a negative control. RNA was also isolated from fungal spores (cured  
130 and wt) which had been engulfed by macrophages, and this was sequenced with a bulk  
131 RNA-Seq approach. Unexposed fungi (cured and wt) were incubated in macrophage media  
132 for a matched time and used as a negative control. The data shows the fungal response to  
133 phagocytosis by macrophages, as well as the fungal response to the presence of its  
134 endosymbiont. The macrophage response to the two species is also revealed, a response  
135 which appears to differ when the endosymbiont is present for both fungal species.

136

## 137 Comparative genomics predicts alternative transcriptional responses

138

139 In order to better understand differential disease progression, we chose to compare *R.*  
140 *delemar* and *R. microsporus*, as they cause a large proportion of mucormycosis infections  
141 but appear morphologically dissimilar. *R. delemar* germinates more quickly than *R.*  
142 *microsporus*, with 50% of spores germinating by 3 hours, and a spore body size which  
143 reaches 12.8  $\mu\text{m}$  over the course of germination (Figure 1b, c). *R. microsporus* germinates at  
144 a significantly slower rate, taking 6 hours for 50% of spores to germinate, with a final spore  
145 body size of 13.9  $\mu\text{m}$  (Figure 1b, c). To better understand their relationship to one another,  
146 we compared the gene content to explore the similarity and differences between the two  
147 species. Previous work has established that the *R. delemar* genome (45.3 Mb, 17,513 genes)  
148 is larger, and contains an increased number of genes, compared to *R. microsporus* genome  
149 (26 Mb, 10,959 genes) (Ma et al. 2009; Mondo et al. 2017). Our results show that, compared  
150 to *R. microsporus*, the genome of *R. delemar* is enriched for genes with protein domains  
151 (PFAM) associated with ion binding, carbohydrate derivative binding, nucleic acid binding,  
152 cytoskeletal protein binding, poly(A) binding, NAD<sup>+</sup> ADP-ribosyltransferase activity, protein  
153 kinase C activity, translation initiation factor binding and inorganic phosphate  
154 transmembrane transporter activity (Supplemental Figure S1, Figure 1d). *R. microsporus* is  
155 enriched for genes with protein domains corresponding to nucleoside phosphate binding,  
156 early endosome activity and DNA repair complex activity (Supplemental Figure S1, Figure  
157 1d). The clear differences illustrated by genome size and gene content indicate the  
158 likelihood of alternative transcriptional responses.

159

160 Alternative transcriptional profiles are presented by *R. delemar* and *R. microsporus* in  
161 response to innate immune cells

162

163 First we examined overall trends in fungal responses to phagocytosis, obtained through our  
164 bulk RNA-Seq approach. We analysed the signal obtained from *R. delemar* and *R.*  
165 *microsporus* samples with principle component analysis (PCA) (Figure 2). We observed large  
166 differences between the transcriptomes of both fungal species, when exposed or  
167 unexposed to macrophages, while the presence or absence of their respective  
168 endosymbionts had a weak but differential effect on PCA. The presence or absence of the  
169 endosymbiont appears to have very little bearing on the transcriptional patterns displayed  
170 by *R. delemar*, as samples fell into two distinct clusters, most strongly influenced by  
171 macrophage status (Figure 2a). *R. microsporus* exhibits a similar trend upon exposure to  
172 macrophages, however the presence of the endosymbiont also influenced clustering (Figure  
173 2b). We investigate the phenotypic consequences of this interaction in the companion  
174 paper by Itabangi et al., showing that the presence of the endosymbiont *Ralstonia pickettii*  
175 impacts fungal cell wall organization, resistance to host-relevant stress, spore germination  
176 efficiency, and pathogenesis (Itabangi et al., 2019). Therefore, we focus here on the  
177 transcriptional analysis of the host-pathogen-endosymbiont interaction across the two  
178 species.

179

180 There are 2,493 genes that are significantly differentially expressed (Log fold change > 2;  
181 false discovery rate < 0.05) in *R. delemar* across all conditions (Figure 3a), while *R.*  
182 *microsporus* only exhibits 40 genes significantly differentially expressed across all conditions  
183 (Log fold change > 2; false discovery rate < 0.05) (Figure 3b). The theme of a muted

184 transcriptional response from *R. microsporius* is also seen within pairwise comparisons of  
185 conditions. Pairwise comparisons of differential expression across each experimental  
186 condition show similar trends in responses between *R. delemar* and *R. microsporius*,  
187 however *R. microsporius* responds with a reduced gene set (Figure 4). Pairwise comparisons  
188 showed the biggest shift in transcriptional response when comparing phagocytosed fungal  
189 spores to those unexposed to macrophages, regardless of endosymbiont status. When  
190 phagocytosed (Supplemental Figure S2), *R. microsporius* upregulates genes enriched in GO  
191 categories corresponding to thiamine metabolism, sulfur metabolism, glycerol metabolism,  
192 alcohol dehydrogenase activity and transmembrane transporter activity (hypergeometric  
193 test, corrected  $P$  value  $< 0.05$ ). This is consistent with the fungal response seen to  
194 macrophage stress (Parente-Rocha et al. 2015), and the micronutrient scavenging response  
195 to nutritional immunity (Ballou and Wilson 2016; Shen et al., 2018; Andrianaki et al., 2018).  
196 Phagocytosed *R. microsporius* downregulated genes enriched in GO categories  
197 corresponding to rRNA processing, ribosome biogenesis and ribosome localization  
198 (hypergeometric test, corrected  $P$  value  $< 0.05$ ) (Supplemental Figure S2), consistent with  
199 growth arrest within the phagolysosome (Inglesfield et al. 2018; Andrianaki et al. 2018).

200  
201 Comparisons of *R. delemar* conditions reveal that, upon phagocytosis, spores upregulate  
202 genes enriched in KEGG classifications corresponding to MAPK signalling, phenylalanine  
203 metabolism, tyrosine metabolism, glutathione metabolism and fatty acid synthesis  
204 (hypergeometric test, corrected  $P$  value  $< 0.05$ ). Upregulation of these processes is  
205 consistent with melanin biosynthesis (Eisenman et al. 2011; Andrianaki et al. 2018) and  
206 intra-phagosomal survival (Yadav et al., 2011; Lorenz and Fink, 2005). Unexposed *R. delemar*  
207 spores upregulate genes enriched in KEGG classifications corresponding to ketone body  
208 synthesis, protein processing via the endoplasmic reticulum, amino sugar and nucleotide  
209 sugar metabolism (hypergeometric test, corrected  $P$  value  $< 0.05$ ). This is consistent with  
210 metabolic activation and cell wall biogenesis (Figure 5).

211  
212 *R. delemar* and *R. microsporius* harbour distinct bacterial endosymbionts (Itabangi et al.,  
213 2019). When comparing transcriptional profiles of wt and cured spores incubated in serum-  
214 free DMEM (sfDMEM) for 3 hours (time matched to phagocytosis assay), we observed very  
215 few transcriptional changes in either species in response to curing (Supplemental Table 1).  
216 In *R. delemar*, a single gene, predicted to be a putative protein phosphatase, was repressed.  
217 In *R. microsporius*, three genes were induced: an autophagy-related protein, a C2H2 zinc  
218 finger transcription factor, and ribosomal protein L2.

219  
220 Despite these small changes, loss of the endosymbiont significantly impacted the  
221 transcriptional responses of both fungal species to macrophages (Figure 4). Specifically, we  
222 observed an overall increase in the number of fungal genes differentially regulated upon  
223 phagocytosis for both species. Exposure of wt *R. microsporius* to macrophages induced the  
224 expression of one gene with no known function and repressed 6 genes. The repressed genes  
225 include an autophagy-related protein and a zinc finger transcription factor, as well as 4 un-  
226 annotated genes (Figure 4, Supplemental Table S1). In contrast, when cured *R. microsporius*  
227 spores were exposed to macrophages, 277 genes were significantly induced and 82  
228 repressed, compared to unexposed cured spores (Figure 4). Induced genes were enriched  
229 (hypergeometric test, corrected  $P$  value  $< 0.05$ ) for the following GO categories: organelle  
230 organisation, pre-ribosome and ribosome activity, ATPase activity, hydrolase activity,

231 pyrophosphatase activity, helicase activity, nucleic acid binding, RNA metabolism, nitrogen  
232 metabolism, chromatin silencing. Repressed genes were enriched (hypergeometric test,  
233 corrected  $P$  value < 0.05) for the following GO categories: oxidoreductase activity, hydrogen  
234 sulphide metabolism, glycolysis, sulphur metabolism, hexose catabolism, siderophore activity,  
235 iron assimilation, nitrogen metabolism, carboxylic acid metabolism. This suggests an overall  
236 failure to properly respond to host stresses such as iron starvation in the absence of the  
237 bacterial endosymbiont.

238

239 A similar impact of the endosymbiont was observed for *R. delemar*. While the overall fungal  
240 response to phagocytosis is characterized by a robust transcriptional response, induced  
241 genes in wt samples (1137 genes, Figure 4) were enriched for KEGG classifications  
242 corresponding to: alanine metabolism, PPAR signalling, aromatic compound biosynthesis  
243 and degradation, lysine metabolism, lipid metabolism, MAPK signalling, sugar metabolism,  
244 tyrosine metabolism, secondary metabolite biosynthesis (Figure 5). Repressed genes in wt  
245 samples (472 genes, Figure 4) were enriched for KEGG classifications corresponding to:  
246 carbohydrate metabolism, secondary metabolite biosynthesis, ketone body processing,  
247 protein processes, MAPK signalling (Figure 5). In contrast, induced genes in cured samples  
248 (1285 genes, Figure 4) were enriched for KEGG classifications corresponding to: Fatty acid  
249 metabolism, DNA replication, amino acid metabolism, glycan metabolism, pyruvate  
250 metabolism, secondary metabolite processing (Figure 5). Repressed genes in cured samples  
251 (878 genes, Figure 4) were enriched for KEGG classifications corresponding to: sugar  
252 metabolism, amino acid metabolism, lipid metabolism, MAPK signalling, NOD-like receptor  
253 signalling. Again, this suggests that the endosymbiont has an overall suppressive impact on  
254 fungal transcription in response to macrophage challenge.

255

256 Next, we directly compared the transcription patterns of genes shared across the two fungal  
257 species. When comparing the transcriptional responses of orthologous genes shared by *R.*  
258 *delemar* and *R. microsporus*, we saw only a small proportion behave similarly (213 genes).  
259 When phagocytosed, wt spores from both species upregulate orthologues genes involved in  
260 fatty acid catabolism, transcription, regulation via polymerase II, and organelle organization.  
261 Phagocytosed cured spores from both species upregulate orthologues genes involved in  
262 RNA processing, chromosome organization and condensed chromosome pathways. When  
263 unexposed, we see wt spores upregulate orthologous genes involved in translocation,  
264 protein binding, siderophore activity, cobalamin processing, and post-translational protein  
265 targeting. Cured unexposed spores upregulate orthologous genes with roles in siderophore  
266 activity and transferase activity. Overall, *R. delemar* and *R. microsporus* both respond  
267 transcriptionally to the presence of macrophages, however the size and composition of this  
268 response differs between species.

269

270 Finally, we examined the regulation of genes predicted to be involved in ferrous iron  
271 transport, as previous work has linked iron scavenging to survival within the phagolysosome  
272 (Andrianaki et al., 2018). There are 12 genes in the *R. delemar* genome with predicted  
273 ferrous iron roles. While 8 showed no significant change over the tested conditions, 3  
274 (ROG3\_006623, ROG3\_007727, ROG3\_011864) appeared highly expressed in wt and cured  
275 phagocytosed spores, compared to unexposed spores. The last gene, ROG3\_009943, is  
276 highly expressed in wt spores unexposed to macrophages. Together, this suggests there

277 may be condition dependent specialization in the expression of ferrous iron transport in *R.*  
278 *delemar*.  
279

280 Innate immune cell transcription varies with fungal species and endosymbiont  
281 presence

282  
283 To investigate the innate immune response when challenged with *R. delemar* and *R.*  
284 *microsporus*, we carried out single cell RNA-Seq of J774.A1 murine macrophages, unexposed  
285 and exposed for 3 hours to the four types of pre-swollen spores (Figure 1a). Transcription of  
286 both challenged and unchallenged macrophages displayed underlying population  
287 heterogeneity (Supplemental Figure S3). To identify the transcriptional patterns of genes  
288 responding to the spores, we focused on the expression of a subset of genes previously  
289 identified as immune response genes (Muñoz et al. 2018). Principle component analysis of  
290 the aggregated transcriptional data shows there is a clear difference in transcription  
291 between macrophages that have and have not been exposed to the fungi (Figure 6). Across  
292 all exposed conditions, relative to unexposed macrophages, there was a profile consistent  
293 with cytokine activation, response to stimulus, and activation of the NF-Kb pathway. This  
294 was accompanied by repression of CCL5, which is involved in T-cell recruitment (Figure 7).  
295 However, different macrophage profiles can be seen in response to the two fungal species,  
296 and these are further influenced by the presence of the endosymbiont. While the response  
297 to wt *R. delemar* shows the most deviation from the macrophage-only control, exposure to  
298 cured *R. delemar* also elicited a strong and distinct macrophage response (Figures 6,7).  
299 Exposure to wt *R. delemar* elicits increased expression of general markers of activation,  
300 including GTPase activity and MHC class II protein binding (LAG3 repressor of T-cell  
301 activation, H2-M2, IFN-gamma induced IIGP1, MX1, KCTD14, PNP2), growth factor binding,  
302 IL1 receptor agonist activity and endocytosis (SERPINE1, ENG, FGFBP3, GM8898, GCNT2,  
303 IL1F6). Specifically, we observe modest increases in the expression of IFN- $\gamma$  responsive  
304 CXCL10 (3.1 fold) and IRG1/IRG11 (5.9 fold), pro-inflammatory SAA3 (3.5 fold), and ENPP4  
305 (2.8 fold), but also induction of the M2 polarizing PSTPIP2/21 (6.7 fold), the IL-4 responsive  
306 signaling modulator CISH (5.4 fold), and the vascular damage responsive F3/F31 (5.9 fold)  
307 (Martinez et al. 2013). These latter genes are not as strongly induced during exposure to *R.*  
308 *microsporus*, which may reflect the aggressive nature of infection by *R. delemar* relative to  
309 *R. microsporus*. In contrast, infection with cured *R. delemar* showed a decrease in the  
310 induction of these M2-polarisation markers (PSTPIP2, 3.5 fold relative to uninduced). The  
311 transcriptional profile is instead shifted to include increased transcription of genes involved  
312 in G protein signaling and phosphoinositide binding (PDE7B, CCL1, SCARF1, RGS16,  
313 PLEKHA4) (Figure 7).

314  
315 A similar change in macrophage polarization was observed during exposure to wt and cured  
316 *R. microsporus*. The phenotypic analysis of this is discussed more fully in Itabangi et al. 2019.  
317 For both wt and cured *R. microsporus*, expression of IFN- $\gamma$  responsive CXCL10, SAA3, and  
318 ENPP4 was comparable to unexposed macrophages. Compared to *R. delemar*, exposure to  
319 wt *R. microsporus* induced a more limited expression of genes with roles in cytokine  
320 activation, ERK1 and ERK2 regulation, and regulation of NF-kB cascade (Figure 7). There was  
321 also a weaker induction of the vascular damage responsive F3/F31 genes, and a relatively  
322 stronger upregulation of the PLA2G16 phospholipase, TRIM30D, SLC1A2 and the M2  
323 polarizing IL-6. However, other key polarizing genes, particularly PSTPIP2/21, SAA3, and

324 ENPP4 were only weakly induced (Supplemental Table S2). Overall, this profile suggests a  
325 weak M1-like activation consistent with poor phagocytosis and reduced overall antifungal  
326 activity that we observe in macrophages interacting with endosymbiont-harboring spores  
327 (Itabangi et al., 2019).

328  
329 Finally, cured *R. microsporus* induced a strong pro-inflammatory response, which included  
330 upregulation of CXCL3, the neutrophil chemoattractant, consistent with our observations of  
331 differences in phagocyte recruitment in zebrafish upon infection with wt vs. cured spores  
332 (Itabangi et al., 2019). Markers of NF- $\kappa$ B activation were also strongly induced in this  
333 population. Cured *R. microsporus* also strongly induced the expression of TNFRSF8 (CD30), a  
334 marker of lymphocyte activation occasionally associated with subcutaneous fungal  
335 infections. Overall, this is suggestive of a shift to a more pro-inflammatory profile. In our  
336 companion paper, we observed that cured *R. microsporus* is more sensitive to phagocyte-  
337 mediated killing and phagocyte recruitment compared to wt (Itabangi et al., 2019). We  
338 therefore went on to test whether a more successful response to the spores could be  
339 mounted via the induction of a pro-inflammatory response.

340

#### 341 Chitin synthase inhibition and pro-inflammatory priming regulate infection outcome

342

343 *R. delemar* exhibits rapid germination followed by hyphal extension (Sephton-Clark et al.,  
344 2018). The transcriptional profile we observe here in macrophages exposed to *R. delemar* is  
345 consistent with a strong damage response, likely prompted by the germination of *R.*  
346 *delemar* spores. We therefore hypothesized that macrophages may be better able to  
347 control the infection if the fungi were slowed in their developmental progress. The necessity  
348 of genes involved in chitin synthesis and regulation appeared important for both *R. delemar*  
349 and *R. microsporus* in response to phagocytosis (Supplemental Figure S4). In previous work  
350 we also highlighted the importance of chitin synthase for germination (Sephton-Clark et al.  
351 2018). When fungal spores were pre-treated with the chitin synthesis inhibitor Nikkomycin Z  
352 (24  $\mu$ g/ml), spores failed to germinate, displayed less chitin/chitosan in their outer cell wall  
353 (Supplemental Figure S5) and macrophage survival was increased at 7.5 hours post infection  
354 (Figure 8). At Nikkomycin Z concentrations lower than those used to pre-treat spores for  
355 phagocytosis, we see the spores are able to swell, however development appears halted  
356 after swelling (Supplemental Figure S5). As the macrophages are better able to control  
357 these spores, this suggests that spores undergoing the initial stages of germination may  
358 offer less of a challenge for the macrophages.

359

360 Our transcriptional data show a strong M2 alternative activation signal during *R. delemar*-  
361 macrophage interaction, but a weaker M2 polarisation during *R. microsporus*-macrophage  
362 interaction that was further shifted towards NF- $\kappa$ B-mediated M1 upon endosymbiont cure.  
363 We therefore hypothesized that shifting the macrophage polarization towards M1 classical  
364 activation might have a protective effect upon Mucorales infection. Consistent with this, the  
365 pre-treatment of macrophages with NF- $\kappa$ B activating lipopolysaccharide (LPS) significantly  
366 improved the ability of macrophages to control *R. microsporus*. At 7.5 hours post infection,  
367 59.7% of macrophages survived when pre-treated with LPS, compared to 24.6% without  
368 (Figure 8).

369



## 370 Discussion

371

372 In this work we show the fungal response to innate immune cells differs by species in the  
373 Rhizopodaceae family. Although *R. delemar* and *R. microsporus* share a small conserved  
374 response to exposure to macrophages, the majority of their response differs. We show that  
375 the ability to germinate prior to phagocyte control appears to be key to virulence, as  
376 blocking spore germination with the chitin synthase inhibitor Nikkomycin Z improves  
377 macrophage survival. A range of germination and virulence phenotypes can be seen  
378 throughout the Mucorales, and this highlights a need for further investigation into these  
379 differences, to better understand the infections they cause.

380

381 We have also shown that the fungal transcriptional response appears largely unperturbed  
382 by the presence, or lack, of an endosymbiont, in the absence of stress. However, the  
383 presence of an endosymbiont greatly effects the response of and to the host. It has been  
384 shown that endosymbionts influence asexual development and sporulation through the  
385 regulation of Ras2 (Mondo et al. 2017). While we observed limited changes in fungal  
386 transcription when comparing wt and cured spores, we did observe changes in the  
387 expression of fungal genes upon exposure to macrophages. In our companion paper,  
388 Itabangi et al show that the presence of an endosymbiont is important for virulence of *R.*  
389 *microsporus*. The endosymbiont enhances virulence through the secretion of an anti-  
390 phagocytic factor. The endosymbiont also impacts organisation of the fungal plasma  
391 membrane, as well as environmental stress resistance and resistance to macrophage-  
392 mediated killing (Itabangi et al., 2019). We show here that this is mirrored by the  
393 transcriptional response of the WT and cured spores of both *Rhizopus* species to  
394 macrophages, and in the macrophage response to infection.

395

396 As anticipated, activation of pro-inflammatory pathways increased macrophage survival in  
397 response to the spores. This consolidates several studies which demonstrate improved  
398 innate immune cell response to fungal pathogens when primed (Rogers et al. 2013; Municio  
399 et al. 2013; Blasi et al. 1995). It has been shown that the early immune response to a *Mucor*  
400 *circinelloides* infection is dependent on the formation of a pro-inflammatory TNF- $\alpha$ -  
401 expressing granuloma-like structure that controls but does not kill spores in the zebrafish  
402 model (Inglesfield et al. 2018). Ungerminated *Rhizopus* spores are highly resistant to  
403 ROS/RNS which may mediate survival within granulomata. Consistent with this, the  
404 induction of a strong proinflammatory response by cured *R. microsporus*, hypersensitive to  
405 ROS/RNS stress, allows macrophages to better control the spores.

406

407 Interestingly, we see the chitin synthase inhibitor, Nikkomycin Z, is able to inhibit  
408 germination in both *R. delemar* and *R. microsporus*. This demonstrates the requirement of  
409 chitin synthase for spore development in these species. Treated spores swell, but do not  
410 polarise. The ability to germinate also has consequences for virulence. The ability of  
411 macrophages to control swollen spores, but not subsequently polarised ones, highlights that  
412 the developmental stage of the spore is key to innate immune success and control. Whilst  
413 many fungal pathogens are virulent in an ungerminated form, germination appears a key  
414 virulence factor for these filamentous fungi. This is confirmed by work which shows that the  
415 developmental stage of both *R. microsporus* and *Rhizopus oryzae* spores impacts  
416 pathogenesis in zebrafish and murine models (Itabangi et al., 2019; Andrianaki et al., 2018).

417 Specifically, infection with pre-swollen spores leads to evasion of macrophage-mediated  
418 immunity and increased pathogenesis (Itabangi et al., 2019; Andrianaki et al., 2018). In both  
419 models, spore clearance is dependent on phagocyte recruitment, and we show that  
420 phagocyte recruitment (in Itabangi et al.) and activation (Figure 7) is influenced by  
421 endosymbiont status (Itabangi et al., 2019; Andrianaki et al., 2018). In addition, we  
422 extended this analysis by revealing profound differences in the host response to two closely  
423 related *Rhizopus* species. In particular, we observe a M2/damage-associated response  
424 during infection with wt *R. delemar* spores that is shifted towards an M1 protective  
425 response upon infection with cured *R. microsporus* spores. We reinforce this finding through  
426 experimental modulation of macrophage polarization, showing that exposure to strongly  
427 M1-polarizing LPS is sufficient to reduce macrophage killing by wt *R. delemar* spores.  
428 Therefore, our data provide a framework for beginning to understand differences in the  
429 relative virulence of pathogenic Mucorales species and underpin our finding of cross-  
430 kingdom fungal-bacterial symbiosis influencing mammalian disease.

431

## 432 Methods

433

### 434 Fungal Culture

435 *R. delemar* and *R. microsporus* were cultured with Sabouraud dextrose agar (SDA) or broth  
436 (10 g/liter mycological peptone, 20 g/liter dextrose), sourced from Sigma-Aldrich, at room  
437 temperature. Spores were harvested, 10 days after plating, with phosphate-buffered saline  
438 (PBS), centrifuged for 3 min at 3,000 rpm, and washed. Appropriate concentrations of  
439 spores were used for further experiments as indicated. To cure spores of their respective  
440 bacterial endosymbionts, spores were cultured with ciprofloxacin, as described in Itabangi  
441 et al. 2019. Once cured, spores were subcultured at least twice in ciprofloxacin-free media  
442 before use.

### 443 Macrophage Culture

444 Macrophages from the J774.A1 cell line were cultured in Dulbecco's Modified Eagle  
445 Medium, (complemented with 10% foetal bovine serum, 1% penicillin, 1% streptomycin and  
446 1% L-glutamine). Macrophages were grown at 37°C, in 5% CO<sub>2</sub>.

447

### 448 Phagocytosis Assay

449 Macrophages were incubated for one hour in serum-free DMEM prior to infection. Spores  
450 were pre-swollen in SAB (2 hr for *R. delemar*, 4 hr for *R. microsporus*). Washed spores were  
451 incubated at 5:1 MOI with  $1 \times 10^5$  macrophages as described in Itabangi et al, to ensure that  
452 >95% of macrophages contained one spore or more. After a 1 hour of incubation, excess  
453 spores were washed off the surface and the macrophages were incubated for a further 2  
454 hours, before processing for RNA-Seq experiments. For live cell imaging experiments,  
455 images were taken starting immediately after the excess spores were removed.

456

### 457 Live Cell Imaging

458 Time course images were taken to determine how LPS pre-treatment (100ng/ml) (Myers et  
459 al. 2010) of macrophages, and Nikkomycin Z pre-treatment (120ug/ml over the course of  
460 swelling in SAB) of spores effected phagocytic outcome. Images were taken at 20x on a Zeiss  
461 Axio Observer, with images taken every 5 minutes. Bright-field and fluorescent images were

462 then analysed using ImageJ V1.

#### 463 Comparative Genomics and Enrichment Analysis

464 Fishers exact test was used to detect enrichment of Pfam terms between *R. delemar* and *R.*  
465 *microsporus*, terms with a corrected P value of < 0.01 were considered significant.  
466 Orthologue genes of *R. delemar* and *R. microsporus* were identified using blast+. R (version  
467 3.3.3) was used to carry out hypergeometric testing of KEGG and GO terms to determine  
468 enrichment.

469

#### 470 Bulk RNA-Seq

471 RNA was extracted from spores which had either been incubated with the macrophages, or  
472 incubated in DMEM for the equivalent time period. To remove the macrophages, triton at  
473 1% was used to lyse the macrophages, the resulting solution was then centrifuged for 3 min  
474 at 3,000 rpm, and washed, leaving only spores. The DMEM control also received the same  
475 treatment. To extract total RNA, the washed samples were immediately immersed in TRIzol  
476 and lysed via bead beating at 6,500rpm for 60s. Samples were then either immediately  
477 frozen at -20°C and stored for RNA extraction or placed on ice for RNA extraction. After lysis,  
478 0.2 ml of chloroform was added for every 1 ml of TRIzol used in the sample preparation.  
479 Samples were incubated for 3 min and then spun at 12,000 g at 4°C for 15 min. To the  
480 aqueous phase, an equal volume of 100% ethanol (EtOH) was added, before the samples  
481 were loaded onto RNeasy RNA extraction columns (Qiagen). The manufacturer's  
482 instructions were followed from this point onwards. RNA quality was checked by Agilent,  
483 with all RNA integrity number (RIN) scores above 7 (Schroeder et al. 2006). One microgram  
484 of total RNA was used for cDNA library preparation. Library preparation was done in  
485 accordance with the NEBNext pipeline, with library quality checked by Agilent. Samples  
486 were sequenced using the Illumina HiSeq platform; 100-bp paired-end sequencing was  
487 employed (2 x 100 bp) (>10 million reads per sample).

#### 488 Single Cell RNA-Seq

489 For single cell sequencing experiments, macrophages were infected with fungal spores, as  
490 outlined above. Uninfected macrophages, used as a negative control, were treated in the  
491 same manner and underwent mock washes and media changes at identical time points to  
492 infected macrophages. Macrophages were isolated and released from the bottom of their  
493 wells with accutase, as per manufacturer's instructions (Technologies n.d.). Once in solution,  
494 the macrophages were loaded onto the 10X genomics single cell RNA sequencing pipeline  
495 for single cell isolation and library preparation. In total, 1082 single cells were sequenced.  
496 The libraries were sequenced on the Illumina Sequencing Platform.

497

#### 498 Data Analysis

499 For the bulk RNA-Seq data, FastQC (version 0.11.5) was employed to ensure the quality of  
500 all samples. Hisat2 (version 2.0.5) was used to align reads to the indexed genome of  
501 *Rhizopus delemar* RA 88-880 (PRJNA13066, Ma et al. 2009) and the indexed genome of  
502 *Rhizopus microsporus* (Mondo et al. 2017). HTSeq (version 0.8.0) was used to quantify the  
503 output (Anders et al. 2015). Trinity and edgeR (Robinson et al. 2009)(version 3.16.5) were  
504 then used to analyse differential expression (Grabherr et al. 2013). For the single cell RNA-  
505 Seq data, the 10X genomics analysis pipeline (Loupe Cell Browser V 2.0.0, Cell Ranger  
506 Version V 2.0.0) was used to align reads to the *mus musculus* genome (version MM10), and

507 quantify the output. For single cell analysis, the samples were then aggregated using this  
508 pipeline, to allow comparisons between samples.

### 509 Data Availability

510 Data will be available upon request.

511

### 512 Acknowledgments

513 We are grateful to the University of Birmingham's Genomics Services Facility and to  
514 Deborah Croom-Carter for her technical support.

515

### 516 Author contributions

517 PSC conceived and designed the experiments, collected the data, performed the analysis  
518 and interpretation, and wrote the manuscript. JFM, KV and CAC contributed to  
519 interpretation of the data, and contributed to the manuscript. ERB conceived and designed  
520 the experiments, contributed to interpretation of the data, and wrote the manuscript.

521

### 522 Funding

523 PSC was supported by a BBSRC MIBTP PhD Studentship (BB/M01116X/1). This work was  
524 supported by a Wellcome Trust Seed award to KV (108387/Z/15/Z). HI was supported by the  
525 Wellcome Trust Strategic Award in Medical Mycology and Fungal Immunology (097377).  
526 CAC and JFM were funded by the National Institute of Allergy and Infectious Diseases,  
527 National Institutes of Health, under award U19AI110818 to the Broad Institute. ERB was  
528 supported by the UK Biotechnology and Biological Research Council (BB/M014525/1) and a  
529 Sir Henry Dale Fellowship jointly funded by the Wellcome Trust and the Royal Society  
530 (211241/Z/18/Z).

531

532

### 533 References

534

535 Alan, E.C. et al., 2019. An Emergent Entity: Indolent Mucormycosis of the Paranasal Sinuses  
536 . A Multicenter Study. , (2193), pp.92–100.

537 Anders, S., Pyl, P.T. & Huber, W., 2015. HTSeq-A Python framework to work with high-  
538 throughput sequencing data. *Bioinformatics*, 31(2), pp.166–169.

539 Andrianaki, A.M. et al., 2018. Iron restriction inside macrophages regulates pulmonary host  
540 defense against *Rhizopus* species. *Nature Communications*, 9(1). Available at:  
541 <http://dx.doi.org/10.1038/s41467-018-05820-2>.

542 Baldin, C. & Ibrahim, A.S., 2017. Molecular mechanisms of mucormycosis—The bitter and  
543 the sweet. *PLOS Pathogens*, 13(8), p.e1006408. Available at:  
544 <http://dx.plos.org/10.1371/journal.ppat.1006408>.

545 Berger, U. V. & Hediger, M.A., 2006. Distribution of the glutamate transporters GLT-1  
546 (SLC1A2) and GLAST (SLC1A3) in peripheral organs. *Anatomy and Embryology*, 211(6),  
547 pp.595–606.

- 548 Blasi, E. et al., 1995. Role of nitric oxide and melanogenesis in the accomplishment of  
549 anticryptococcal activity by the BV-2 microglial cell line. *Journal of Neuroimmunology*,  
550 58(1), pp.111–116.
- 551 Chamilos, G. et al., 2008. Zygomycetes Hyphae Trigger an Early , Robust Proinflammatory  
552 Response in Human Polymorphonuclear Neutrophils through Toll-Like Receptor 2  
553 Induction but Display Relative Resistance to Oxidative Damage . , 52(2), pp.722–724.
- 554 Chibucos, M.C. et al., 2016. An integrated genomic and transcriptomic survey of  
555 mucormycosis-causing fungi. *Nature Publishing Group*, 7, pp.1–11. Available at:  
556 <http://dx.doi.org/10.1038/ncomms12218>.
- 557 Gerrick, K.Y. et al., 2018. Transcriptional profiling identifies novel regulators of macrophage  
558 polarization. *Plos One*, 13(12), p.e0208602. Available at:  
559 <http://dx.plos.org/10.1371/journal.pone.0208602>.
- 560 Ghuman, H. & Voelz, K., 2017. Innate and Adaptive Immunity to Mucorales. *Journal of Fungi*,  
561 3(4), p.48. Available at: <http://www.mdpi.com/2309-608X/3/3/48>.
- 562 Grabherr, M.G., Brian J. Haas, Moran Yassour Joshua Z. Levin, Dawn A. Thompson, Ido Amit,  
563 Xian Adiconis, Lin Fan, Raktima Raychowdhury, Qiandong Zeng, Zehua Chen, Evan  
564 Mauceli, Nir Hacohen, Andreas Gnirke, Nicholas Rhind, Federica di Palma, Bruce W., N.  
565 & Friedman, and A.R., 2013. Trinity: reconstructing a full-length transcriptome without  
566 a genome from RNA-Seq data. *Nature Biotechnology*, 29(7), pp.644–652.
- 567 Hoffmann, K. et al., 2013. The family structure of the Mucorales: a synoptic revision based  
568 on comprehensive multigene-genealogies. , pp.57–76.
- 569 Hou, Y. et al., 2014. The inhibitory effect of IFN-gamma on protease HTRA1 expression in  
570 rheumatoid arthritis. *Journal of immunology (Baltimore, Md. : 1950)*, 193(1), pp.130–  
571 138.
- 572 Ibrahim, A.S. et al., 2008. Bacterial endosymbiosis is widely present among zygomycetes but  
573 does not contribute to the pathogenesis of mucormycosis. *The Journal of infectious*  
574 *diseases*, 198(7), pp.1083–1090.
- 575 Inglesfield et al., 2018. Robust Phagocyte Recruitment Controls the Opportunistic Fungal  
576 Pathogen *Mucor circinelloides* in Innate Granulomas In Vivo. , 9(2), pp.1–20.
- 577 Kobayashi, D.Y. & Crouch, J.A., 2009. Bacterial/Fungal interactions: from pathogens to  
578 mutualistic endosymbionts. *Annual review of phytopathology*, 47, pp.63–82.
- 579 Kraibooj, K. et al., 2014. Virulent strain of *Lichtheimia corymbifera* shows increased  
580 phagocytosis by macrophages as revealed by automated microscopy image analysis.  
581 *Mycoses*, 57(s3), pp.56–66.
- 582 Liu, M. et al., 2018. Comparative genome-wide analysis of extracellular small RNAs from the  
583 mucormycosis pathogen *Rhizopus delemar*. *Scientific Reports*, 8(1), p.5243. Available  
584 at: <http://www.nature.com/articles/s41598-018-23611-z>.

- 585 Lockett-Chastain, L. et al., 2016. IL-6 influences the balance between M1 and M2  
586 macrophages in a mouse model of irritant contact dermatitis. *The Journal of*  
587 *Immunology*, 196(1 Supplement), p.196.17--196.17. Available at:  
588 [http://www.jimmunol.org/content/196/1\\_Supplement/196.17](http://www.jimmunol.org/content/196/1_Supplement/196.17).
- 589 Ma, L.J. et al., 2009. Genomic analysis of the basal lineage fungus *Rhizopus oryzae* reveals a  
590 whole-genome duplication. *PLoS Genetics*, 5(7).
- 591 Martinez, F.O. et al., 2013. Genetic programs expressed in resting and IL-4 alternatively  
592 activated mouse and human macrophages: similarities and differences. *Blood*, 121(9),  
593 pp.e57-69.
- 594 Mendoza, L. et al., 2014. Human Fungal Pathogens of Mucorales and Entomophthorales.  
595 *Cold Spring Harbor perspectives in medicine*, 10(1101). Available at:  
596 <http://perspectivesinmedicine.cshlp.org/>.
- 597 Mondo, S.J. et al., 2017. Bacterial endosymbionts influence host sexuality and reveal  
598 reproductive genes of early divergent fungi. *Nature Communications*, 8(1), p.1843.  
599 Available at: <https://doi.org/10.1038/s41467-017-02052-8>.
- 600 Municio, C. et al., 2013. The Response of Human Macrophages to  $\beta$ -Glucans Depends on the  
601 Inflammatory Milieu. *PLoS ONE*, 8(4).
- 602 Muñoz, J.F. et al., 2018. Coordinated host-pathogen transcriptional dynamics revealed using  
603 sorted subpopulations and single, *Candida albicans* infected macrophages. *bioRxiv*,  
604 p.350322. Available at: <http://biorxiv.org/content/early/2018/06/19/350322.abstract>.
- 605 Myers, J.T., Tsang, A.W. & Swanson, J.A., 2010. Activation of Murine Macrophages. *Current*  
606 *Protocols Immunology*, 171(10), pp.5447–5453.
- 607 Owen, J.L. & Mohamadzadeh, M., 2013. Macrophages and chemokines as mediators of  
608 angiogenesis. *Frontiers in Physiology*, 4 JUL(July), pp.1–8.
- 609 Petraitis, V. et al., 2013. Increased virulence of *Cunninghamella bertholletiae* in  
610 experimental pulmonary mucormycosis: correlation with circulating molecular  
611 biomarkers, sporangiospore germination and hyphal metabolism. *Medical mycology*,  
612 51(1), pp.72–82.
- 613 Raggi, F. et al., 2017. Regulation of human Macrophage M1-M2 Polarization Balance by  
614 hypoxia and the Triggering receptor expressed on Myeloid cells-1. *Frontiers in*  
615 *Immunology*, 8(SEP), pp.1–18.
- 616 Robinson, M.D., McCarthy, D.J. & Smyth, G.K., 2009. edgeR: A Bioconductor package for  
617 differential expression analysis of digital gene expression data. *Bioinformatics*, 26(1),  
618 pp.139–140.
- 619 Rogers, H. et al., 2013. Role of bacterial lipopolysaccharide in enhancing host immune  
620 response to *Candida albicans*. *Clinical and Developmental Immunology*, 2013.
- 621 Schmidt, S. et al., 2013. Immunobiology *Rhizopus oryzae* hyphae are damaged by human

- 622 natural killer ( NK ) cells , but suppress NK cell mediated immunity. *Immunobiology*,  
623 218(7), pp.939–944. Available at: <http://dx.doi.org/10.1016/j.imbio.2012.10.013>.
- 624 Schroeder, A. et al., 2006. The RIN: an RNA integrity number for assigning integrity values to  
625 RNA measurements. *BMC molecular biology*, 7(1), p.3. Available at:  
626 <http://www.pubmedcentral.nih.gov/articlerender.fcgi?artid=1413964&tool=pmcentrez>  
627 &rendertype=abstract.
- 628 Schwartz, V.U. et al., 2014. Gene Expansion Shapes Genome Architecture in the Human  
629 Pathogen *Lichtheimia corymbifera*: An Evolutionary Genomics Analysis in the Ancient  
630 Terrestrial Mucorales (Mucoromycotina). *PLoS Genetics*, 10(8).
- 631 Sephton-Clark, P.C.S. et al., 2018. Pathways of Pathogenicity: Transcriptional Stages of  
632 Germination in the Fatal Fungal Pathogen *Rhizopus delemar*. *mSphere*, 3(5), pp.1–16.
- 633 Spellberg, B., Edwards, J. & Ibrahim, A., 2016. Novel Perspectives on Mucormycosis:  
634 Pathophysiology , Presentation , and Management. , 18(3), pp.556–569.
- 635 Szulzewsky, F. et al., 2015. Glioma-associated microglia/macrophages display an expression  
636 profile different from M1 and M2 polarization and highly express Gpnmb and Spp1.  
637 *PLoS ONE*, 10(2), pp.1–27.
- 638 Technologies, S., Accutase Directions For Use. Available at:  
639 [https://cdn.stemcell.com/media/files/pis/29637-](https://cdn.stemcell.com/media/files/pis/29637-PIS_1_0_2.pdf?_ga=2.10286005.1436903603.1548350382-38118485.1548350382)  
640 [PIS\\_1\\_0\\_2.pdf?\\_ga=2.10286005.1436903603.1548350382-38118485.1548350382](https://cdn.stemcell.com/media/files/pis/29637-PIS_1_0_2.pdf?_ga=2.10286005.1436903603.1548350382-38118485.1548350382).
- 641 van Tol, S. et al., 2017. The TRIMendous Role of TRIMs in Virus–Host Interactions. *Vaccines*,  
642 5(3), p.23. Available at: <http://www.mdpi.com/2076-393X/5/3/23>.
- 643 Warris, A. et al., 2005. Cytokine responses and regulation of interferon-gamma release by  
644 human mononuclear cells to *Aspergillus fumigatus* and other filamentous fungi. ,  
645 (November), pp.613–621.
- 646 Ye, R.D. & Sun, L., 2015. Emerging functions of serum amyloid A in inflammation. *Journal of*  
647 *Leukocyte Biology*, 98(6), pp.923–929. Available at:  
648 <http://www.jleukbio.org/cgi/doi/10.1189/jlb.3VMR0315-080R>.

649

## 650 Figure legends

651

652 **Figure 1 Phenotypic and genomic comparisons.** A) Experimental setup: Pre-swollen (Sab)  
653 WT or cured fungal spores from *Rhizopus delemar* (2hr) and *Rhizopus microsporus* (4hr) in  
654 mid-isotropic phase were co-cultured with J774.1 murine macrophages (sfDMEM) at 5:1  
655 MOI for 1hr, washed to remove unengulfed spores, then co-incubated for a further 2 hr and  
656 RNA for fungi and host cells harvested. Pre-swollen spores (Sab) incubated in sfDMEM for  
657 3hr served as the negative control. B) Germination percentage over time for *R. delemar* and  
658 *R. microsporus* grown in Sab. C) Spore sizes for *R. delemar* and *R. microsporus* grown in SAB.  
659 D) Pfam terms enriched (corrected P < 0.01) in *R. delemar* vs *R. microsporus* genomes, with

660 colour indicating the extent of enrichment (Log<sub>10</sub> Count).

661 **Figure 2 Principal component analysis of fungal genes differentially expressed across all**  
662 **samples.** A) *R. delemar* wt and cured, macrophage engulfed or sfDMEM control B) *R.*  
663 *microsporus* wt and cured, macrophage engulfed or sfDMEM control. Replicates (n=3) are  
664 shown for each sample.

665 **Figure 3 Clustering of fungal transcriptional changes.** A) Heatmap displaying differentially  
666 expressed genes in *R. delemar*. Expression levels are plotted in Log<sub>2</sub>, space and mean-  
667 centered (FDR < 0.001) B) Heatmap displaying differentially expressed genes in *R.*  
668 *microsporus*. Expression levels are plotted in Log<sub>2</sub>, space and mean-centered (FDR < 0.001)

669 **Figure 4 Differential expression of fungal genes in compared conditions.** A) The number of  
670 genes significantly differentially expressed (multiple corrected P value < 0.05) between  
671 samples. Blue bars indicate genes with an increase in expression (LogFC > 2), whilst orange  
672 bars indicate genes with a decrease in expression (LogFC < -2).

673 **Figure 5 Gene functions of genes differentially expressed in *R. delemar*.** Enriched KEGG  
674 categories for the up/down regulated genes over sample comparisons. The enrichment of  
675 the category is indicated by the colour bar. White corresponds to no enrichment, and yellow  
676 to red corresponds to the given P value of the enrichment.

677 **Figure 6 Principal component analysis of macrophage genes differentially expressed**  
678 **across all samples.** Single cell sequencing was performed on uninfected and infected  
679 macrophages. Transcriptional data from the experiment was analysed with the 10X  
680 genomics analysis pipeline, and aggregated prior to principle component analysis.

681 **Figure 7 Clustering of macrophage transcription.** Heatmap displaying immune response  
682 genes significantly differentially expressed between macrophage populations. Expression  
683 levels are plotted in Log<sub>2</sub> (FDR < 0.001)

684 **Figure 8 Macrophage survival following exposure to *R. delemar* and *R. microsporus* spores.**  
685 Macrophages +/- LPS pre-treatment were infected (MOI 5:1) with fungal spores, pre-swollen  
686 in SAB consistent with single cell experiments. Macrophages were infected with fungal  
687 spores that were pre-treated with +/- Nikkomycin Z (24 µg/ml; n=3 for each sample).  
688 Macrophage survival was determined 7 hr post infection. Significant differences between  
689 samples is indicated by (\*= p < 0.01).

690 **Supplementary Figure 1** Table of Pfam terms found to be enriched (corrected P < 5 x 10<sup>-8</sup>) in  
691 *R. delemar* and *R. microsporus* upon genome comparison.

692 **Supplementary Figure 2 Clustering of fungal transcription with GO annotation.** Heatmap  
693 displaying all differentially expressed genes, across all conditions, in *R. microsporus*.  
694 Expression levels are plotted in Log<sub>2</sub>, space and mean-centered (FDR < 0.001).

695 **Supplementary Figure 3 Clustering and heterogeneity in single cell analysis of J774.1**  
696 **macrophages.** Single cell plot generated by loupe cell browser. Colors indicate experimental  
697 conditions as indicated. Spacial distribution indicates relative similarity across all detected  
698 transcripts. 1082 single cells represented.



699 **Supplementary Figure 4 Expression of chitin synthase genes.** A) Heatmap showing the  
700 expression of chitin synthase genes in *R. delemar* B) Heatmap showing the expression of  
701 chitin synthase genes in *R. microsporus*

702 **Supplementary Figure 5 Chitin synthase inhibition of *R. delemar* and *R. microsporus***  
703 **germination.** *R. delemar* and *R. microsporus* treated with Nikkomycin Z in SAB at indicated  
704 concentrations for the indicated times. Fluorescence indicates calcofluor white staining, and  
705 thus the availability of chitin/chitosan in the cell wall. Labels indicate time and  
706 concentration of inhibitor.

707 **Supplemental Table 1** Selected genes differentially regulated in pairwise comparisons, with  
708 Pfam annotations provided where available.

709 **Supplementary Table 2** Table displaying the LogFC values for a subset of genes displayed in  
710 Figure 7.

711

A

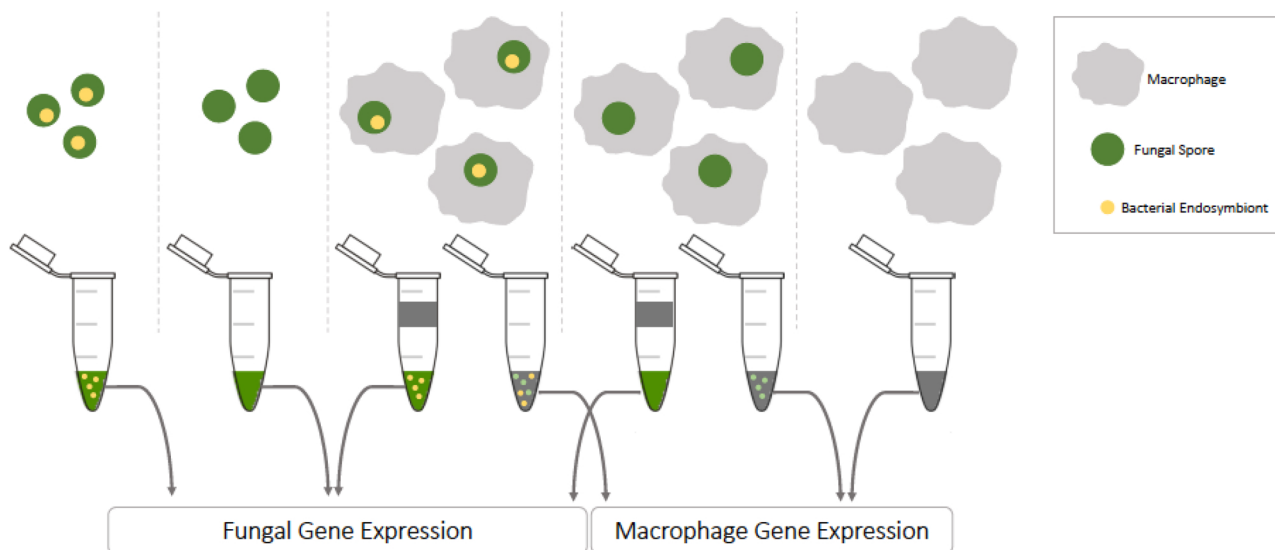

B

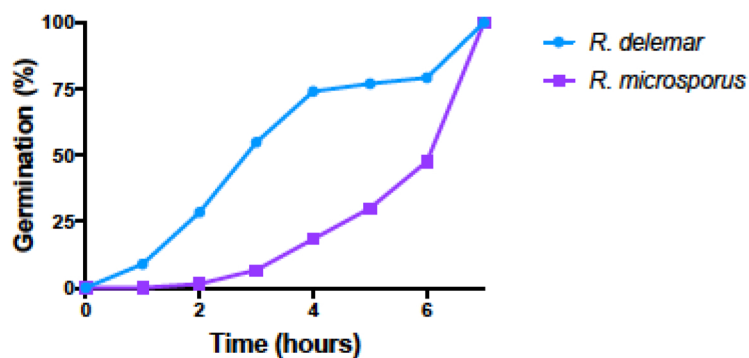

C

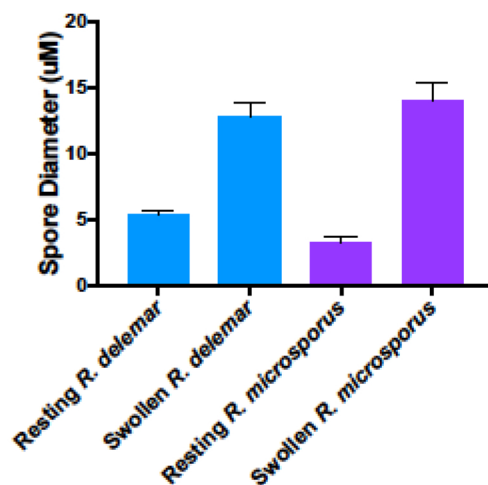

D

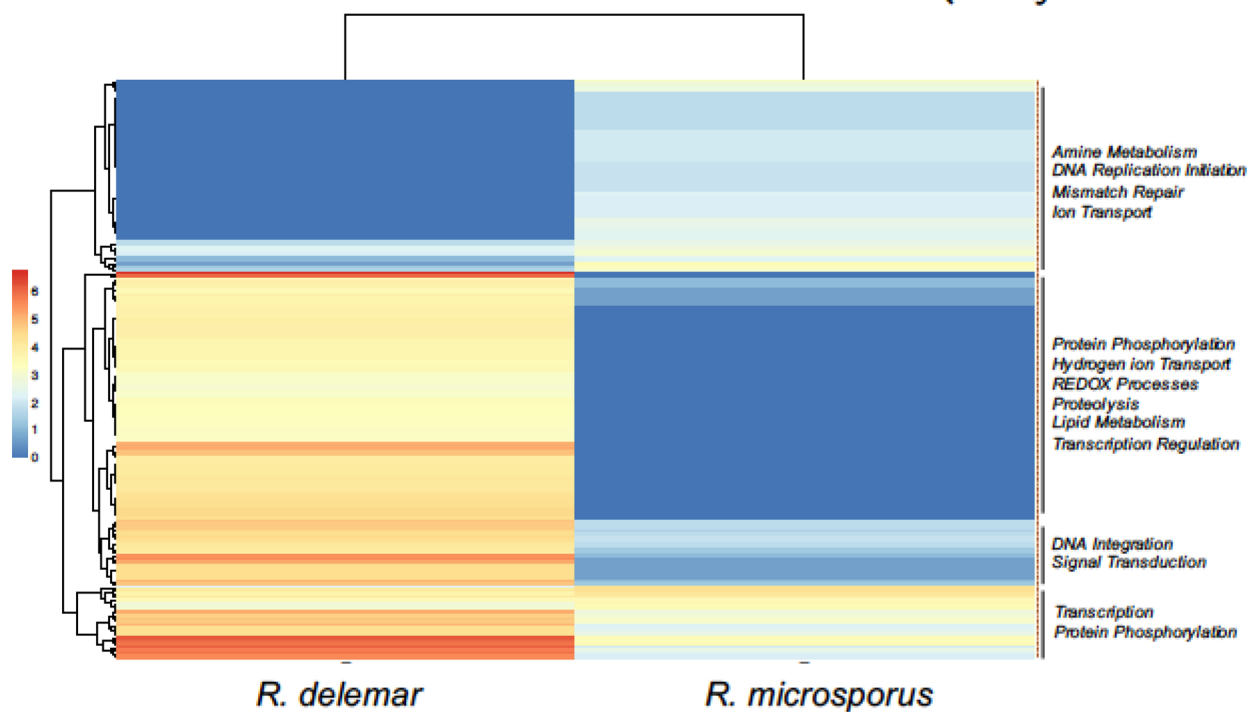

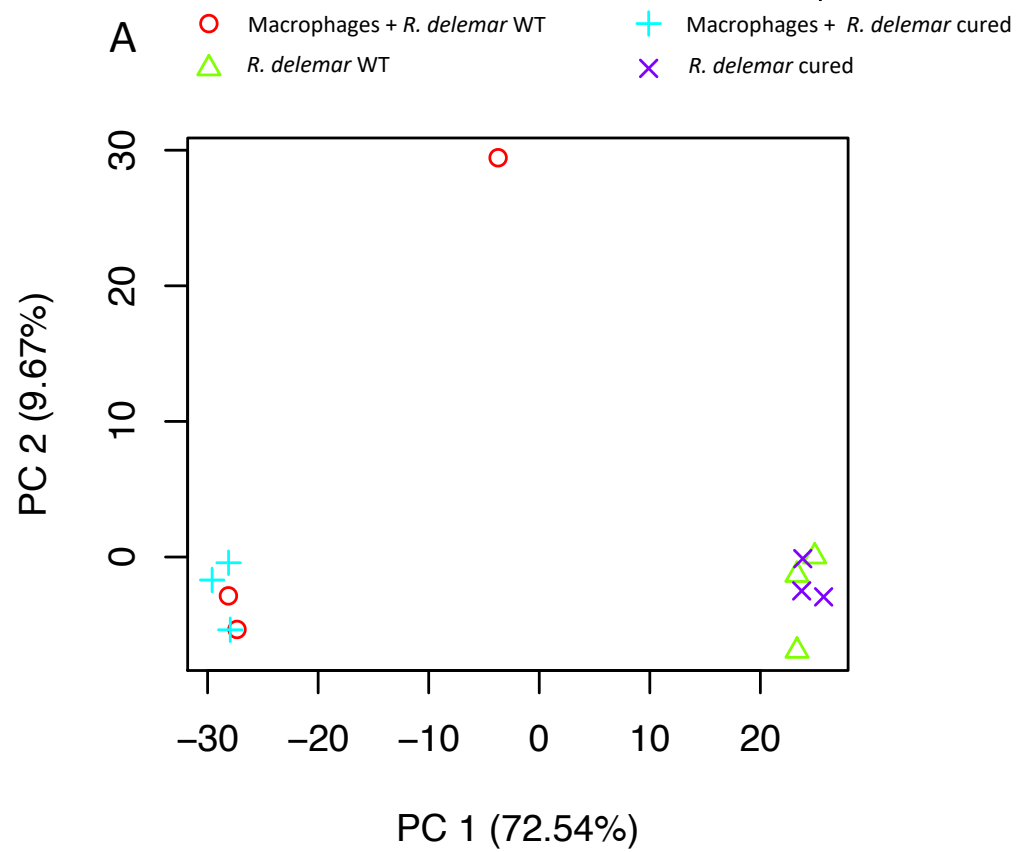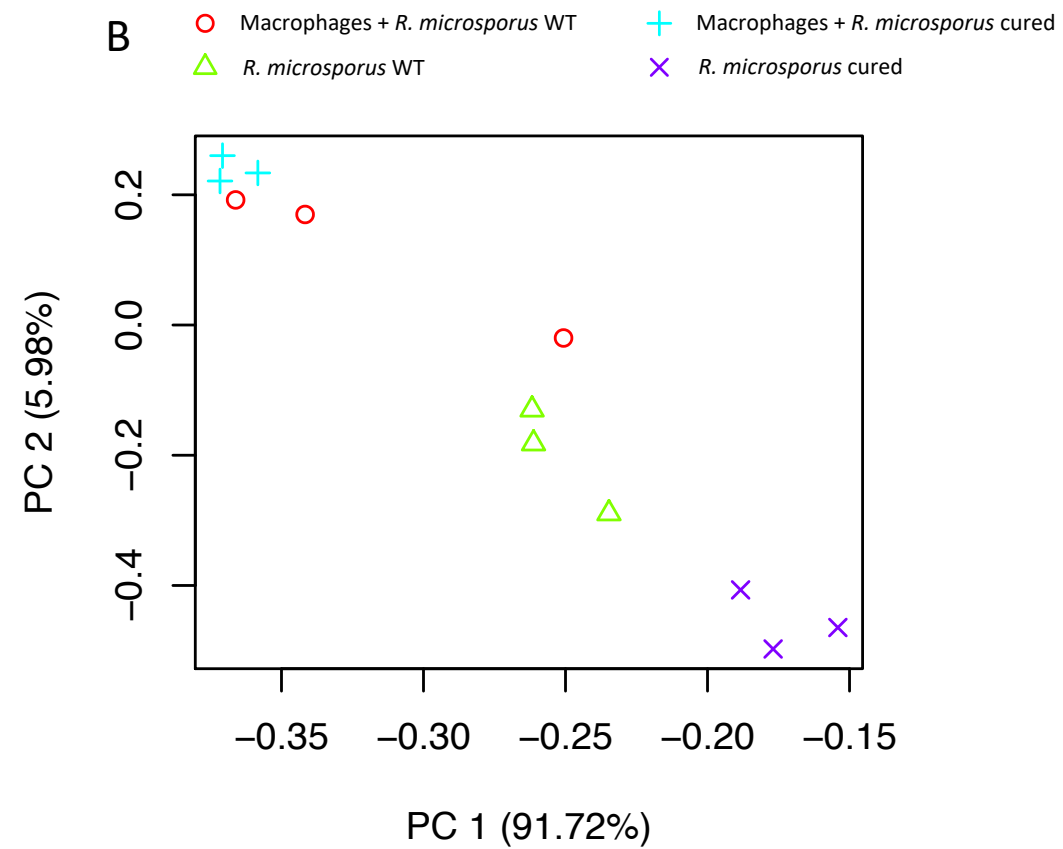

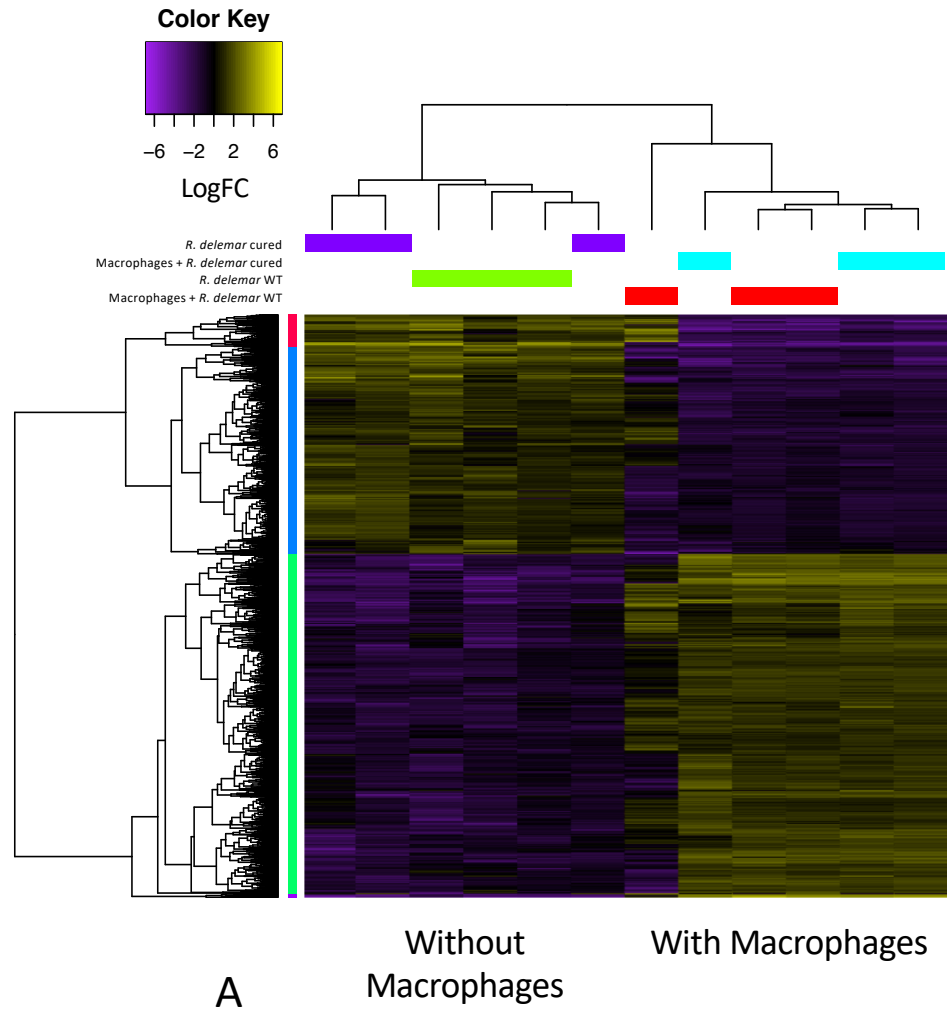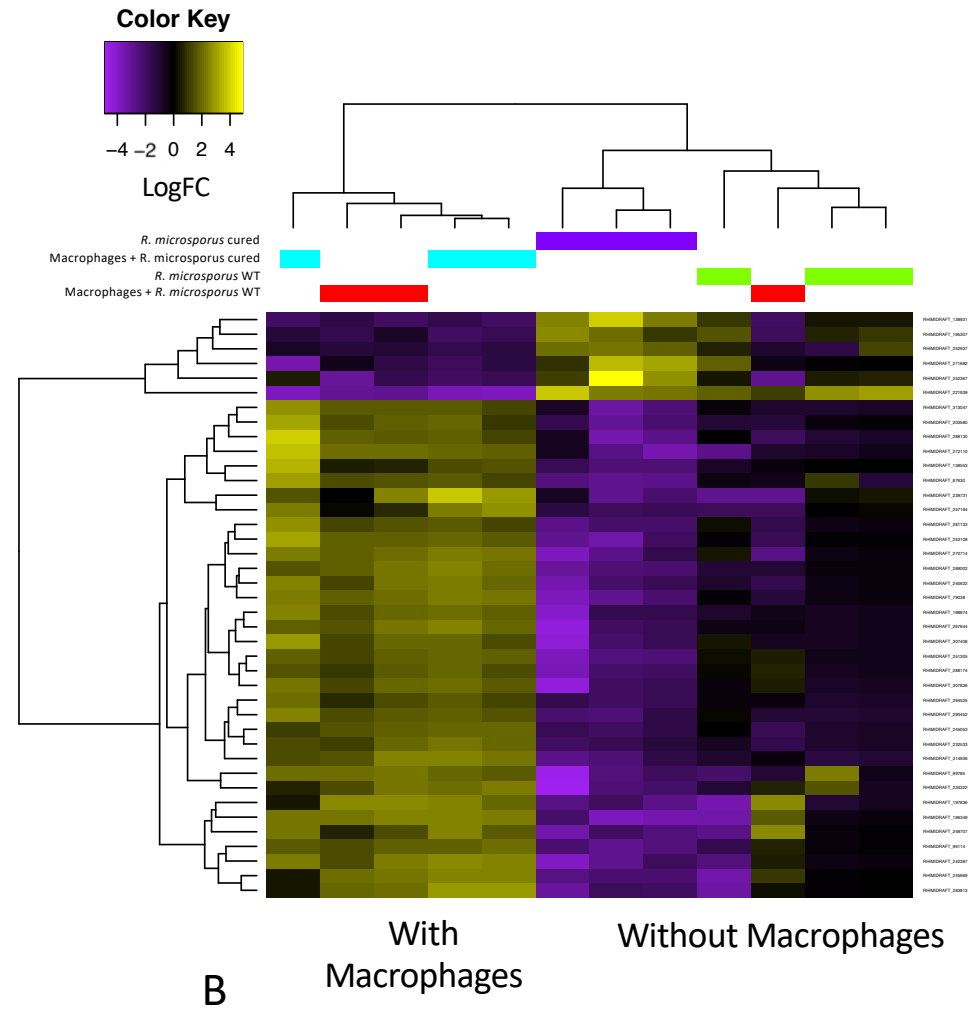

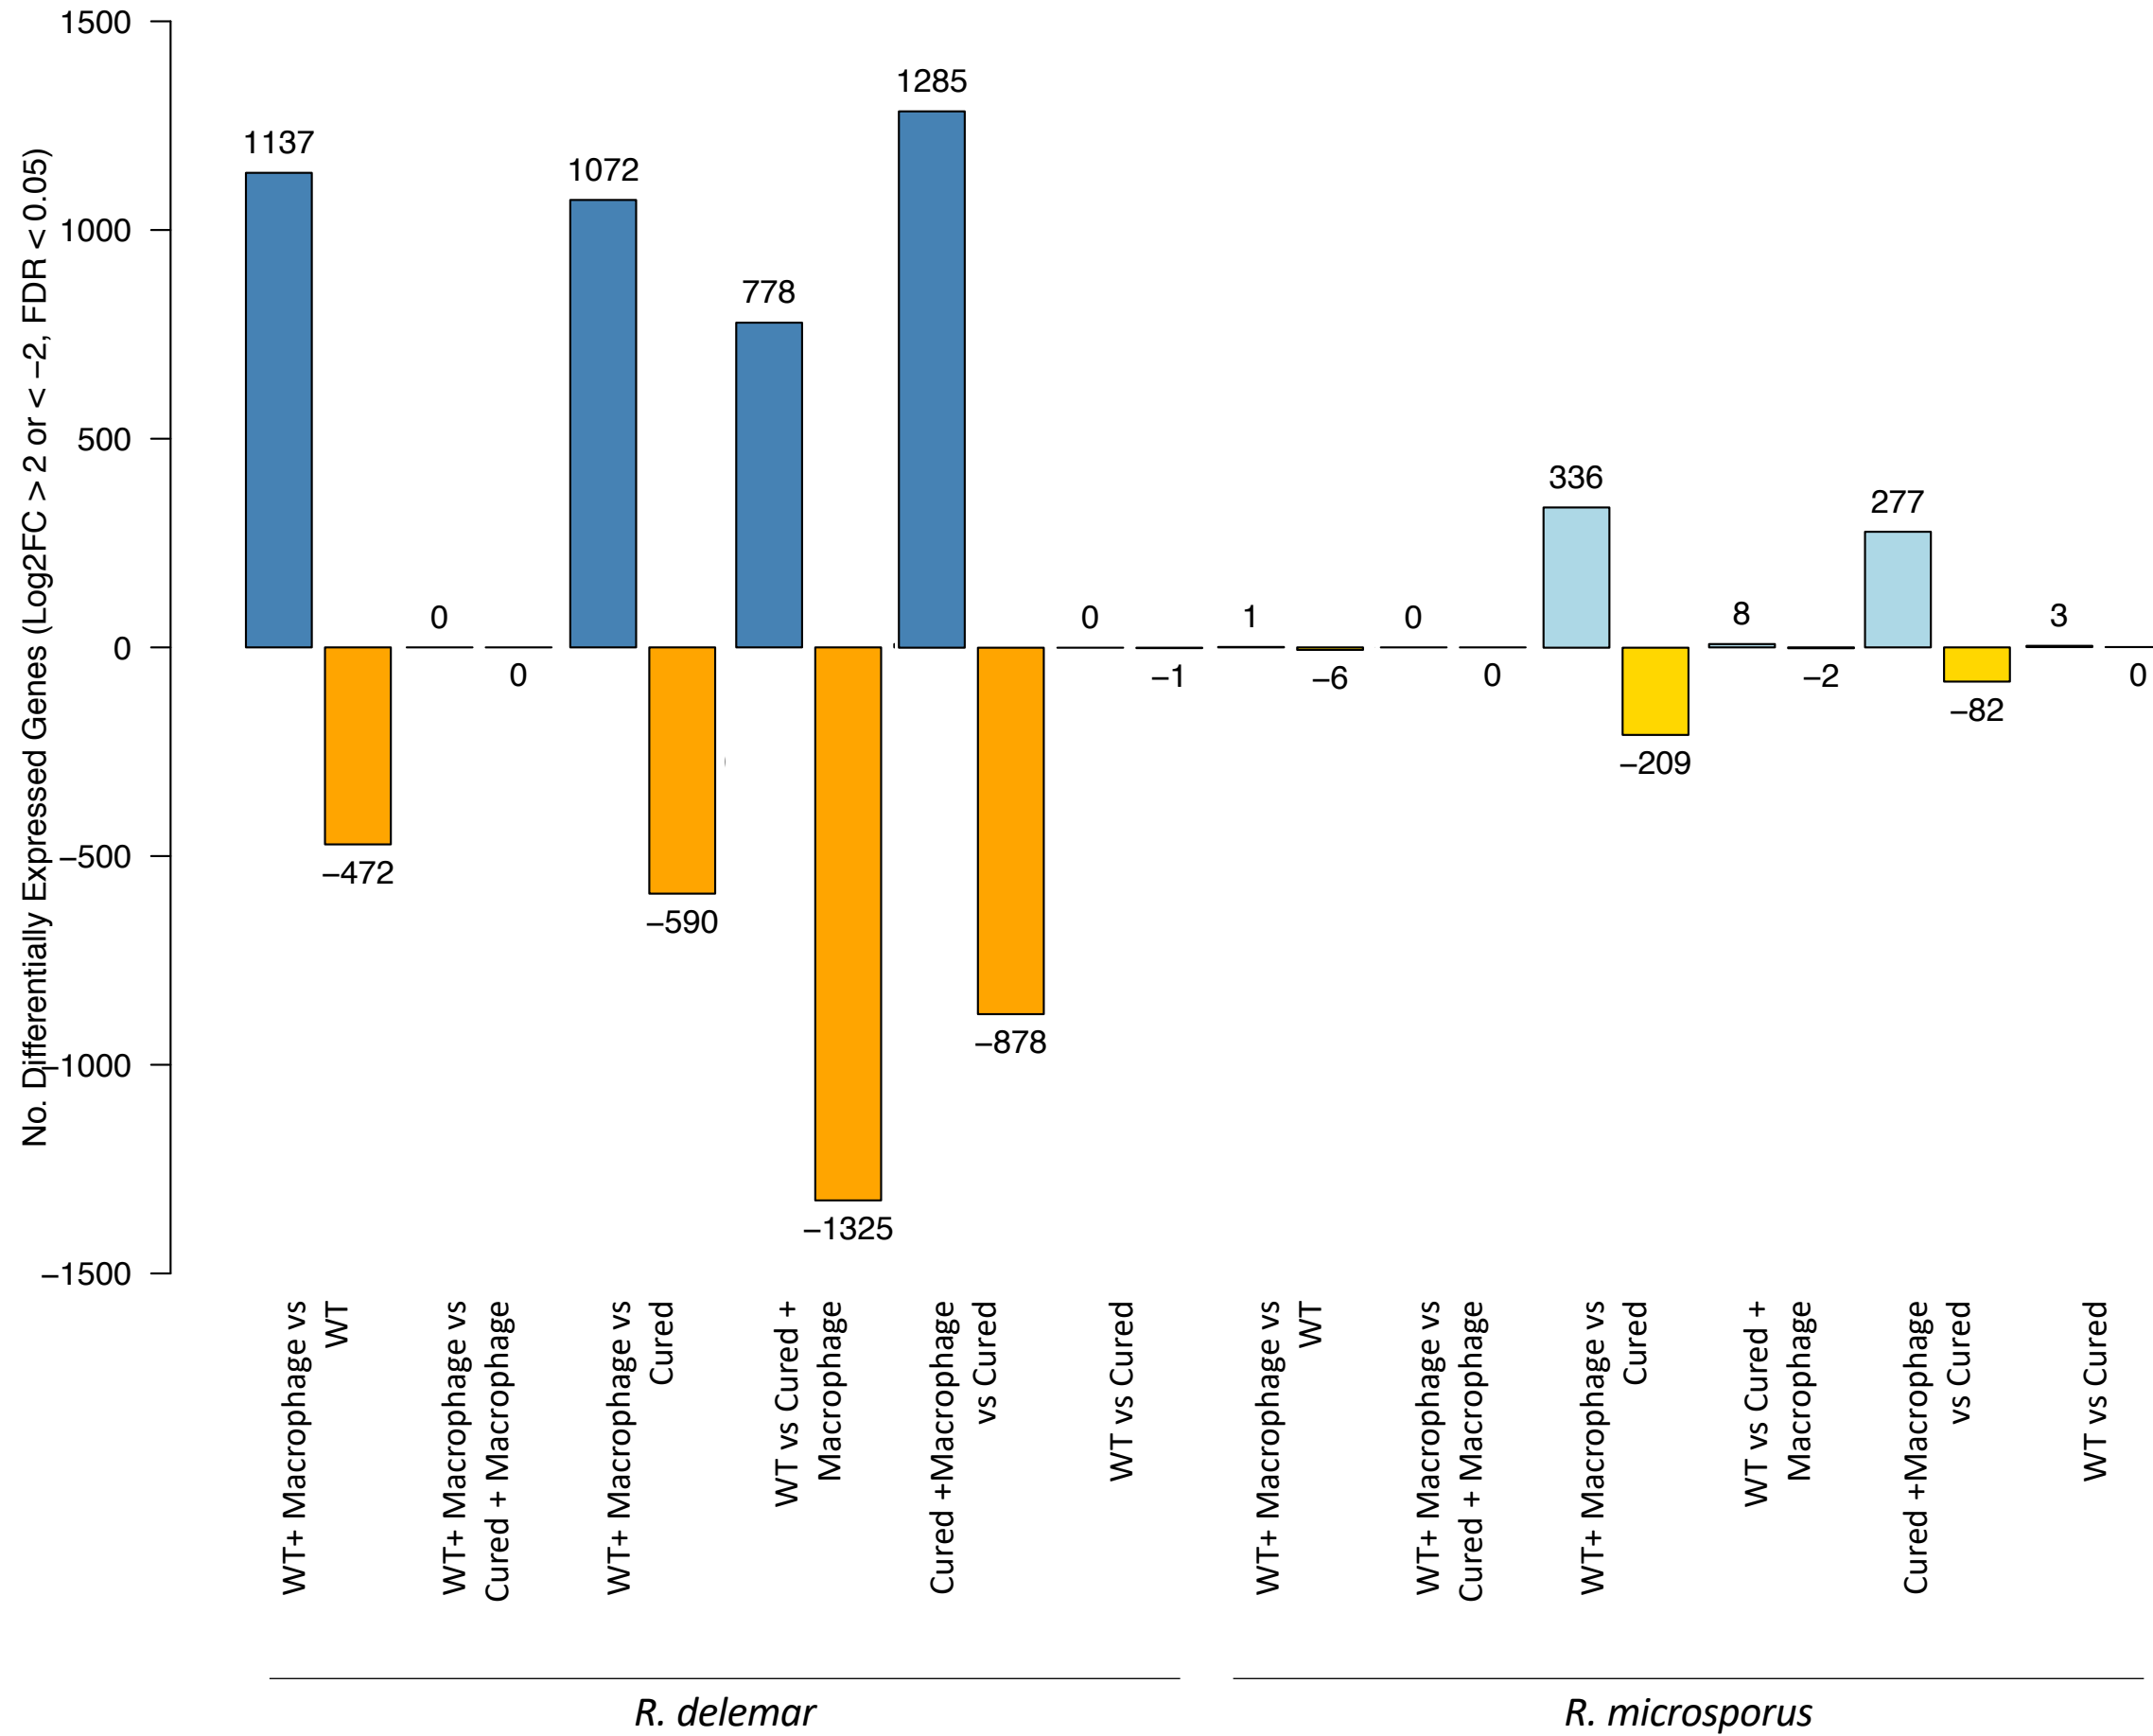



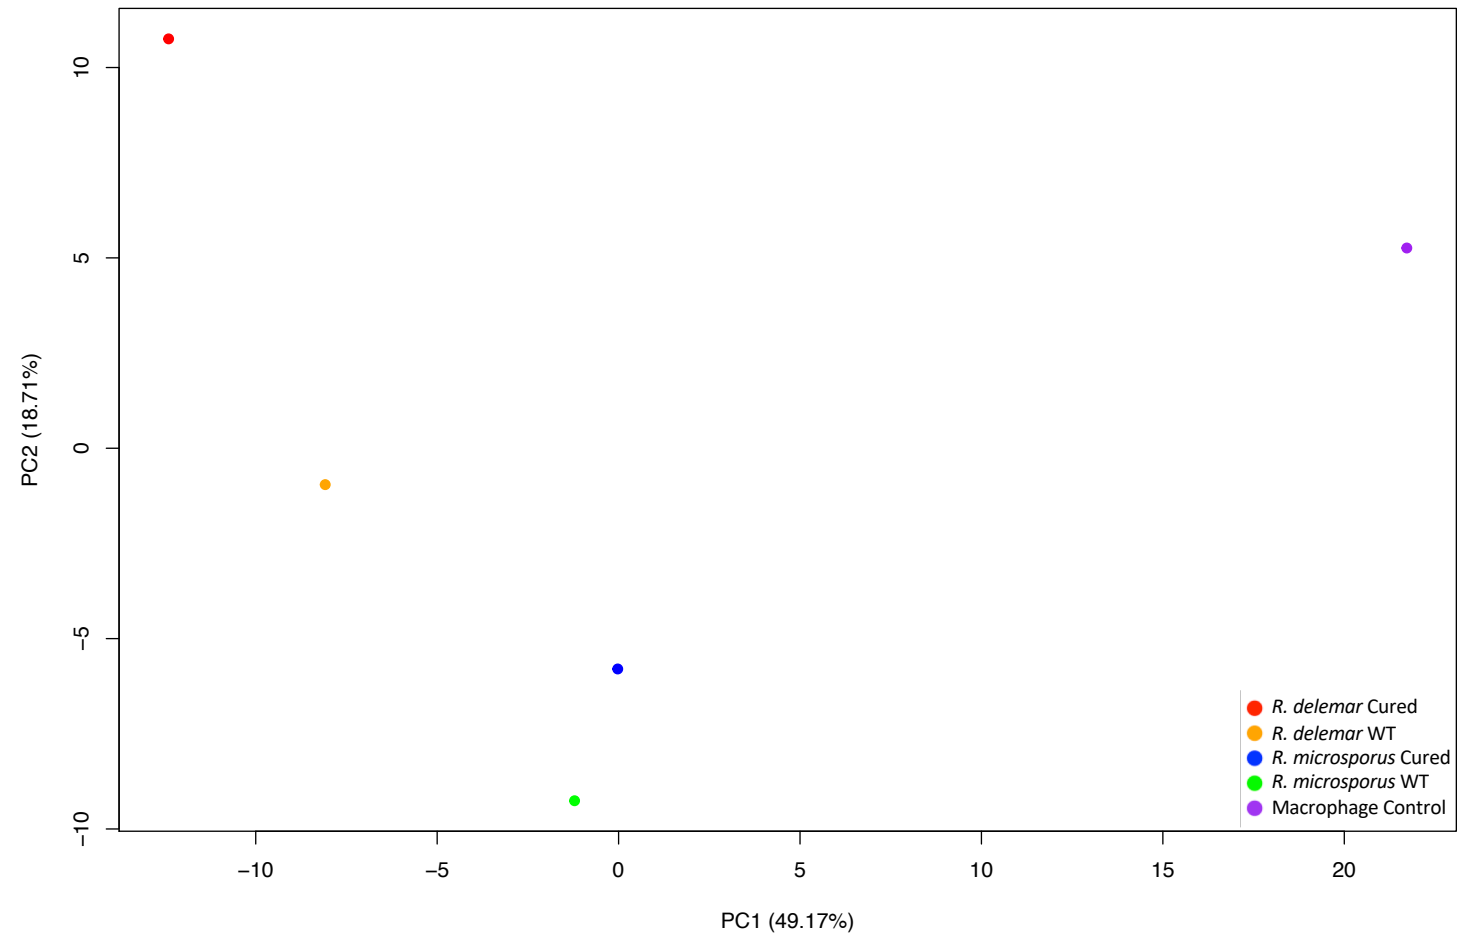

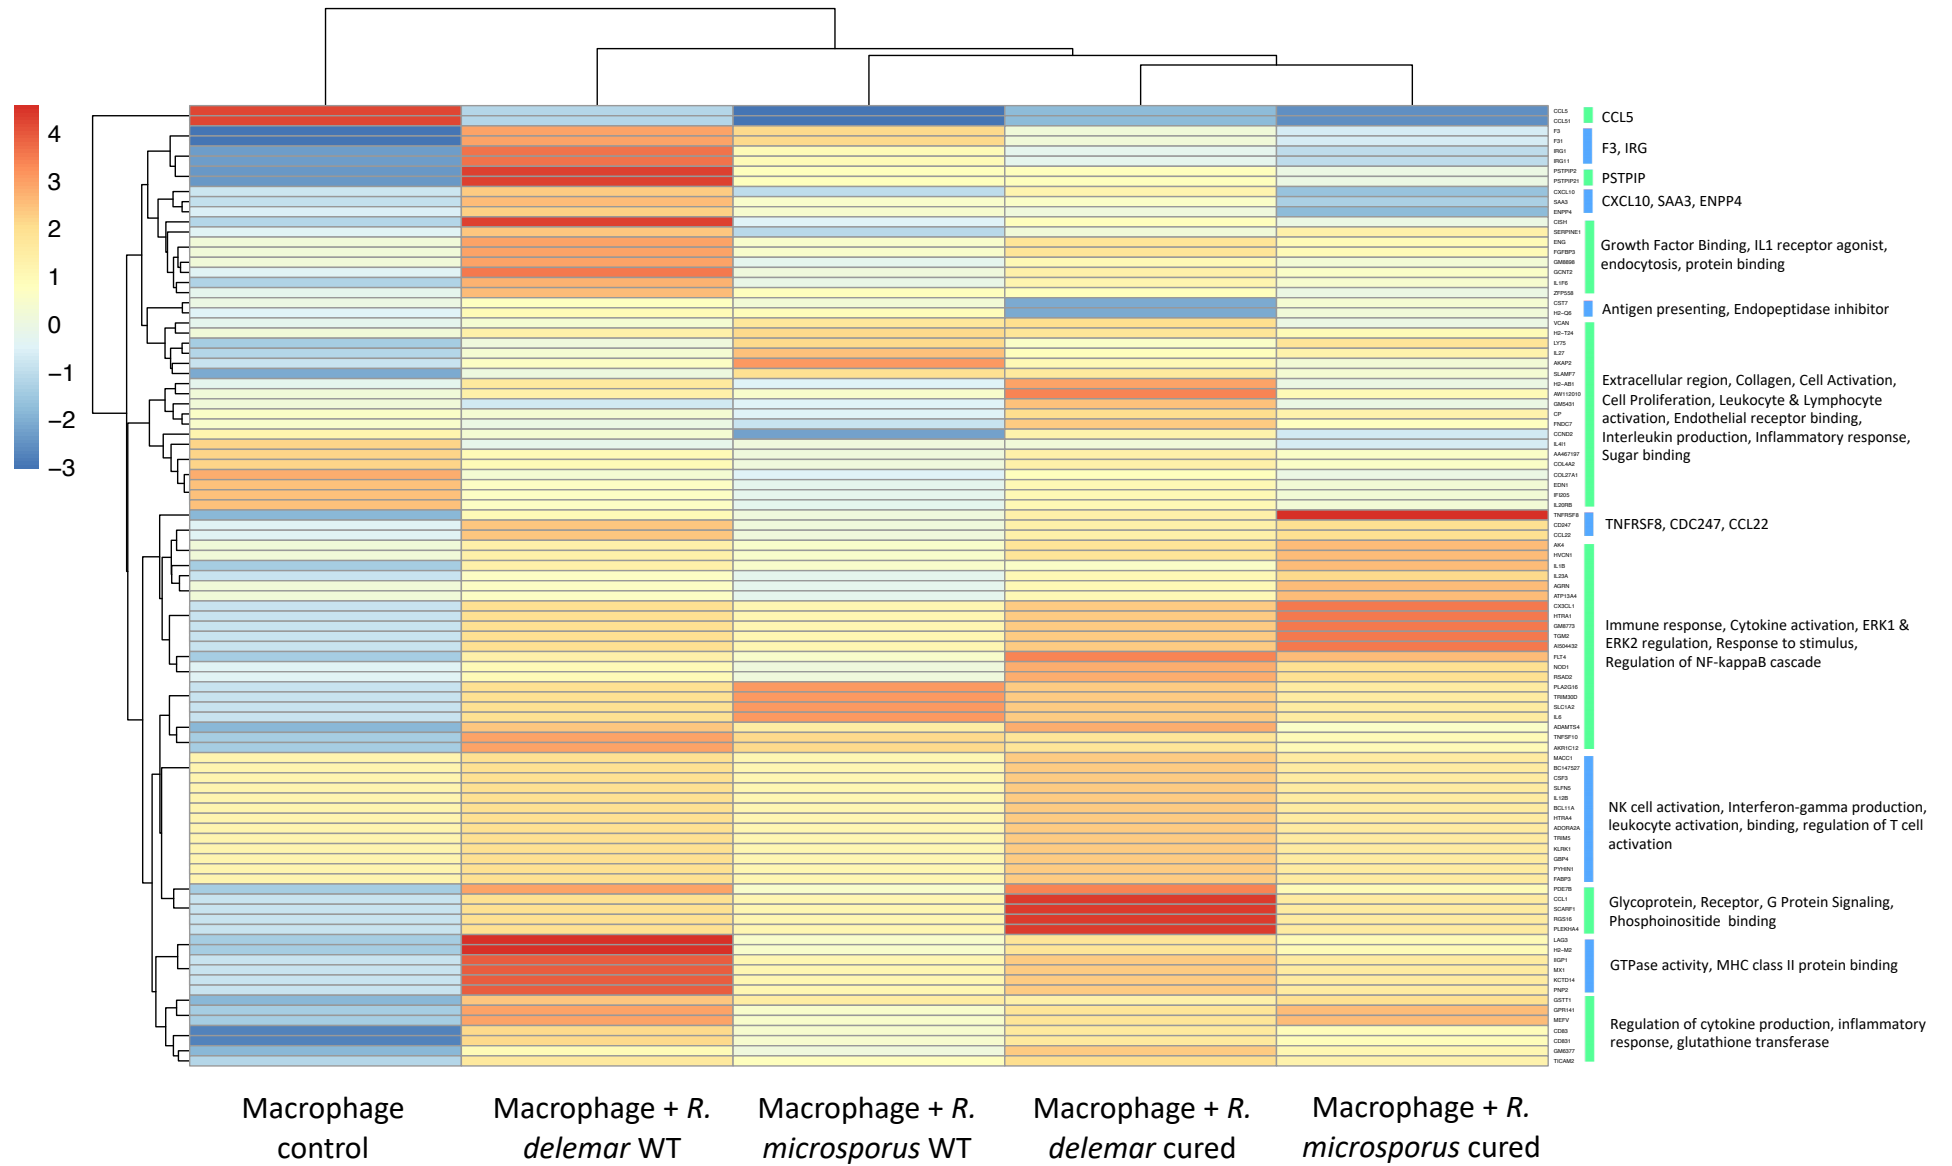



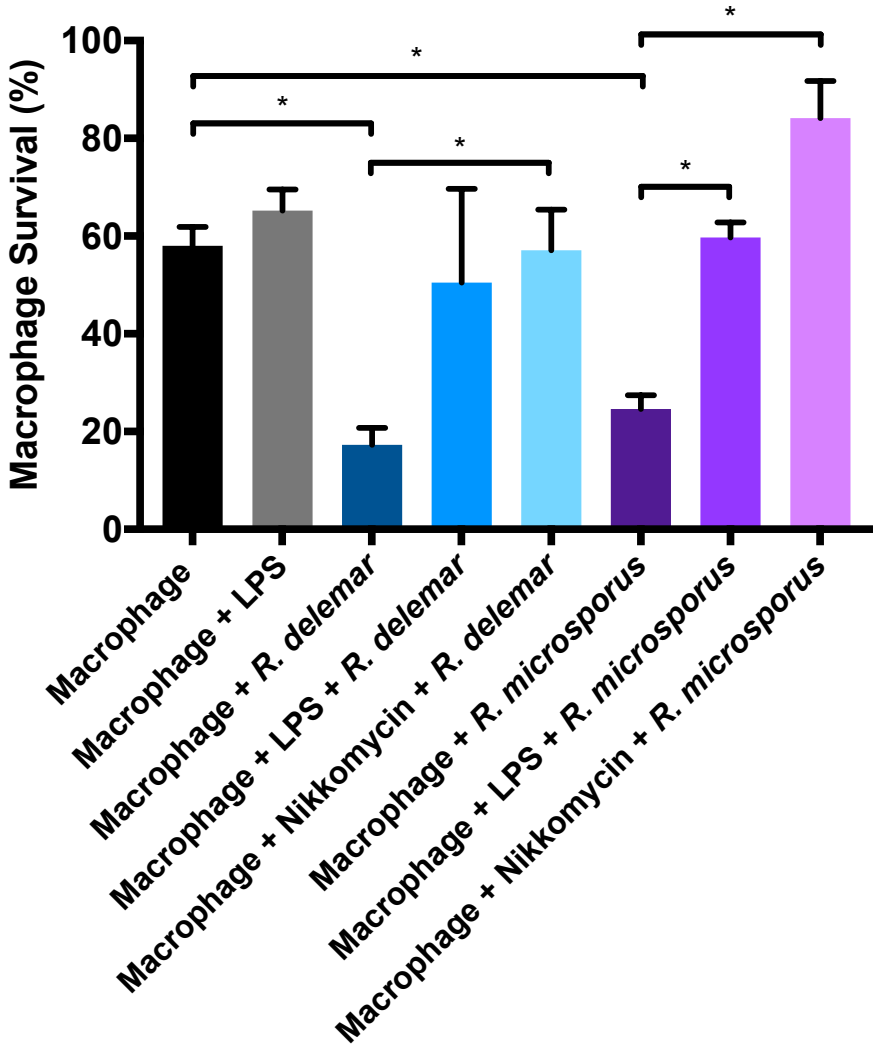

Source: https://www.biorxiv.org/content/10.1101/580746v1.full.pdf
