# Supplementary material for: Bacterial endosymbionts influence fungal transcriptional profiles with implications for host response in the human fungal pathogens Rhizopus microsporus and Rhizopus delemar
Source: bioRxiv or medRxiv preprint supplement (doi:10.1101/580746), 2020-12-02
Supplement: Supplementary file [file media-1.pdf]

|         | <i>R. delemar</i> | <i>R. microsporus</i> | q-value   |
|---------|-------------------|-----------------------|-----------|
| PF01498 | 873               | 1                     | 6.96E-127 |
| PF07714 | 418               | 0                     | 4.69E-60  |
| PF00385 | 499               | 8                     | 7.87E-60  |
| PF13358 | 532               | 32                    | 3.27E-42  |
| PF03372 | 373               | 10                    | 1.17E-39  |
| PF08238 | 284               | 2                     | 1.47E-36  |
| PF13551 | 258               | 3                     | 1.62E-31  |
| PF00400 | 429               | 31                    | 1.59E-30  |
| PF00078 | 330               | 14                    | 2.18E-30  |
| PF13893 | 293               | 9                     | 7.33E-30  |
| PF07282 | 10                | 78                    | 1.09E-28  |
| PF00077 | 177               | 0                     | 1.58E-24  |
| PF13516 | 194               | 2                     | 7.20E-24  |
| PF13606 | 179               | 1                     | 4.45E-23  |
| PF12895 | 164               | 0                     | 1.15E-22  |
| PF13894 | 374               | 36                    | 1.49E-21  |
| PF08284 | 140               | 1                     | 2.36E-17  |
| PF07653 | 153               | 3                     | 9.95E-17  |
| PF00271 | 124               | 1                     | 4.77E-15  |
| PF12894 | 2                 | 33                    | 1.74E-13  |
| PF13833 | 94                | 0                     | 3.81E-12  |
| PF02992 | 126               | 4                     | 3.94E-12  |
| PF13191 | 4                 | 33                    | 8.65E-12  |
| PF09668 | 99                | 1                     | 1.51E-11  |
| PF13857 | 99                | 1                     | 1.51E-11  |
| PF14259 | 87                | 0                     | 3.94E-11  |
| PF00096 | 61                | 85                    | 6.25E-11  |
| PF03732 | 129               | 6                     | 6.41E-11  |
| PF07690 | 151               | 10                    | 7.81E-11  |
| PF13041 | 0                 | 23                    | 8.70E-11  |
| PF13812 | 92                | 1                     | 1.45E-10  |
| PF12937 | 42                | 69                    | 1.56E-10  |
| PF13504 | 80                | 0                     | 2.17E-10  |
| PF12762 | 95                | 2                     | 6.02E-10  |
| PF13637 | 120               | 6                     | 7.56E-10  |
| PF00153 | 177               | 17                    | 8.42E-10  |
| PF00512 | 76                | 0                     | 8.48E-10  |
| PF08662 | 93                | 2                     | 8.84E-10  |
| PF04670 | 89                | 2                     | 3.54E-09  |
| PF01209 | 82                | 1                     | 3.55E-09  |
| PF00025 | 115               | 6                     | 3.82E-09  |
| PF13374 | 70                | 0                     | 5.60E-09  |
| PF13650 | 86                | 2                     | 8.34E-09  |
| PF00665 | 87                | 2                     | 8.97E-09  |
| PF05148 | 77                | 1                     | 1.28E-08  |
| PF08659 | 66                | 0                     | 2.28E-08  |
| PF12773 | 0                 | 18                    | 2.66E-08  |
| PF03184 | 64                | 0                     | 3.66E-08  |
| PF09011 | 65                | 0                     | 3.66E-08  |
| PF00071 | 18                | 40                    | 4.49E-08  |
