# Supplementary material for: Bacterial endosymbionts influence fungal transcriptional profiles with implications for host response in the human fungal pathogens Rhizopus microsporus and Rhizopus delemar
Source: bioRxiv or medRxiv preprint supplement (doi:10.1101/580746), 2020-12-02
Supplement: Supplementary file [file media-2.pdf]

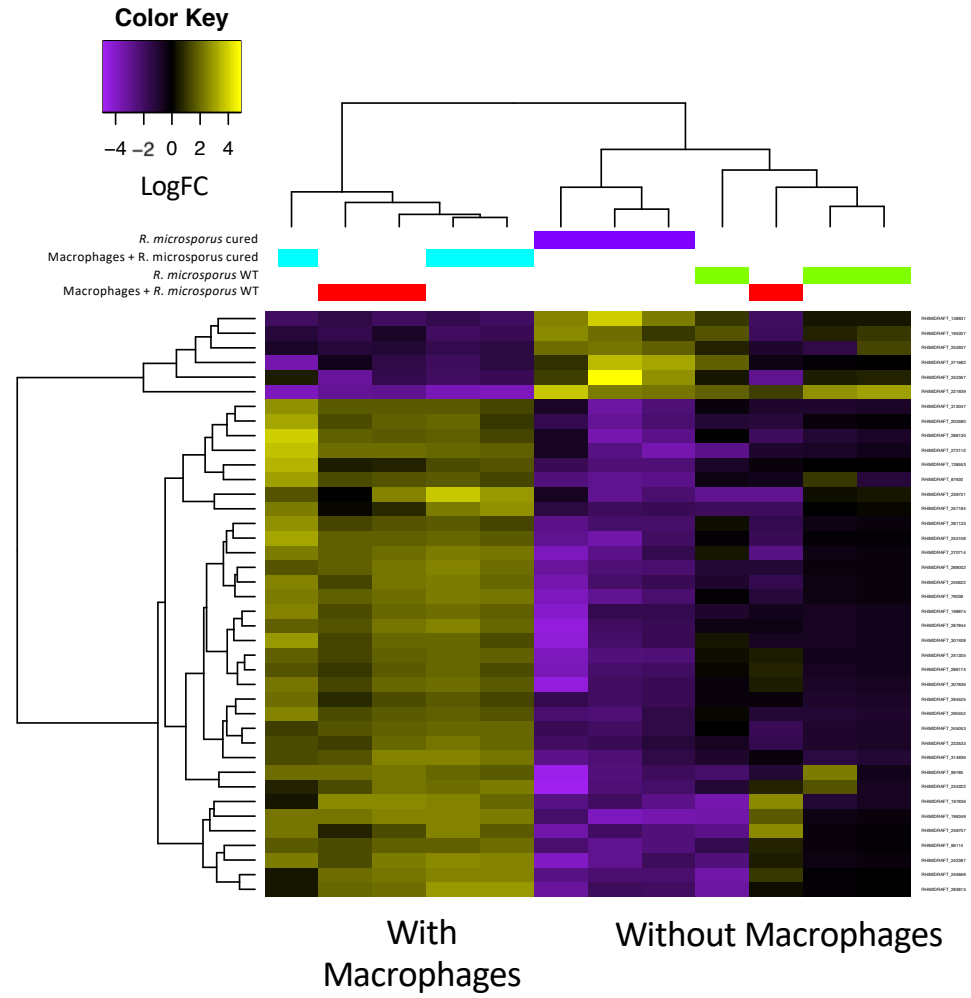

rRNA Processing, Ribosome Biogenesis and localisation

Thiamine metabolism, sulphur metabolism, glycerol metabolism, transmembrane transporter activity and alcohol dehydrogenase activity
