# Supplementary material for: Bacterial endosymbionts influence fungal transcriptional profiles with implications for host response in the human fungal pathogens Rhizopus microsporus and Rhizopus delemar
Source: bioRxiv or medRxiv preprint supplement (doi:10.1101/580746), 2020-12-02

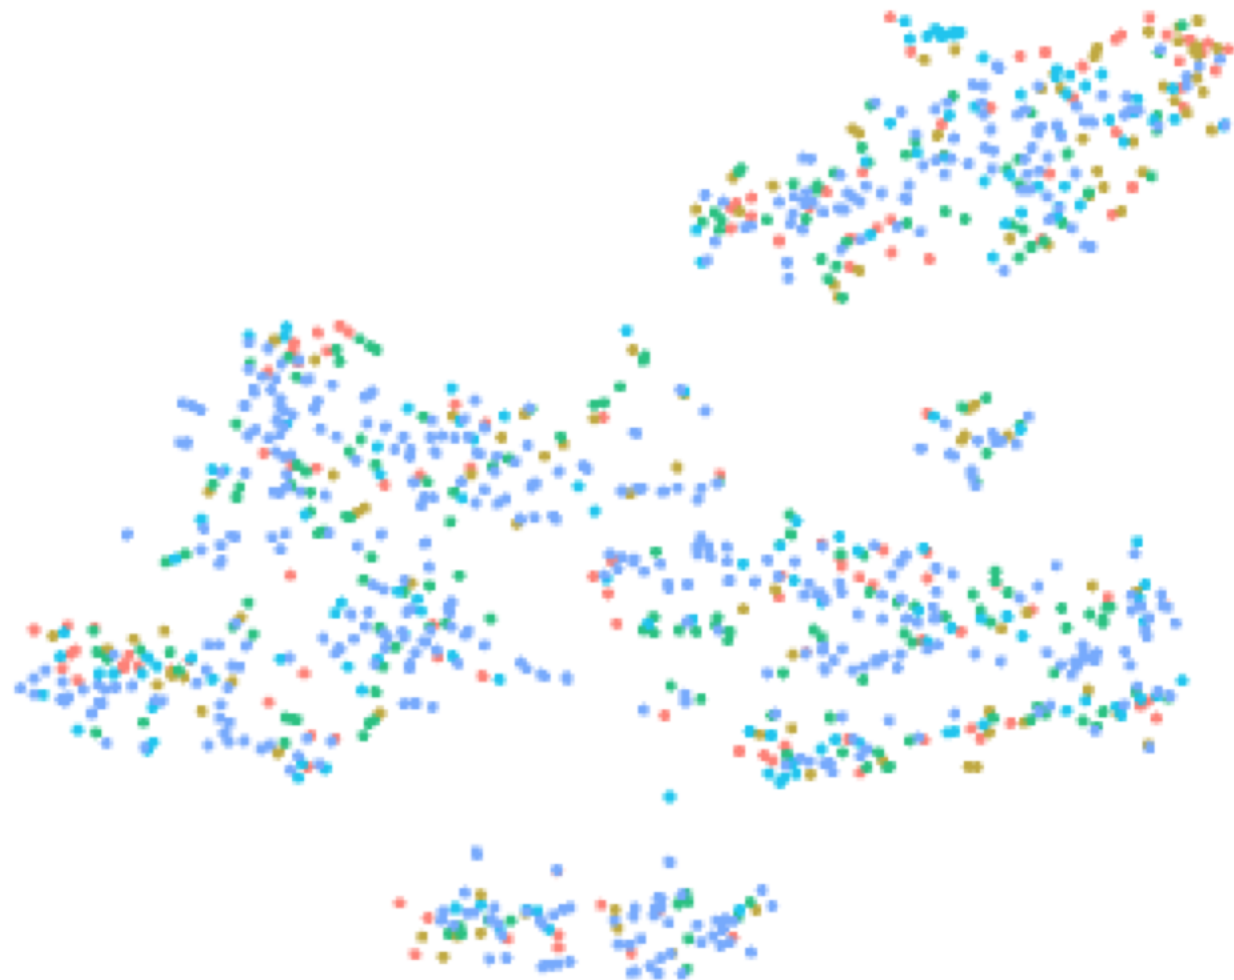

R. delemar wt

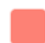

R. delemar cured

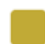

R. microsporius wt

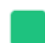

R. microsporius cured

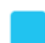

Macrophage Control

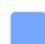

Supplement: Supplementary file [file media-3.pdf]
