# Supplementary material for: Bacterial endosymbionts influence fungal transcriptional profiles with implications for host response in the human fungal pathogens Rhizopus microsporus and Rhizopus delemar
Source: bioRxiv or medRxiv preprint supplement (doi:10.1101/580746), 2020-12-02

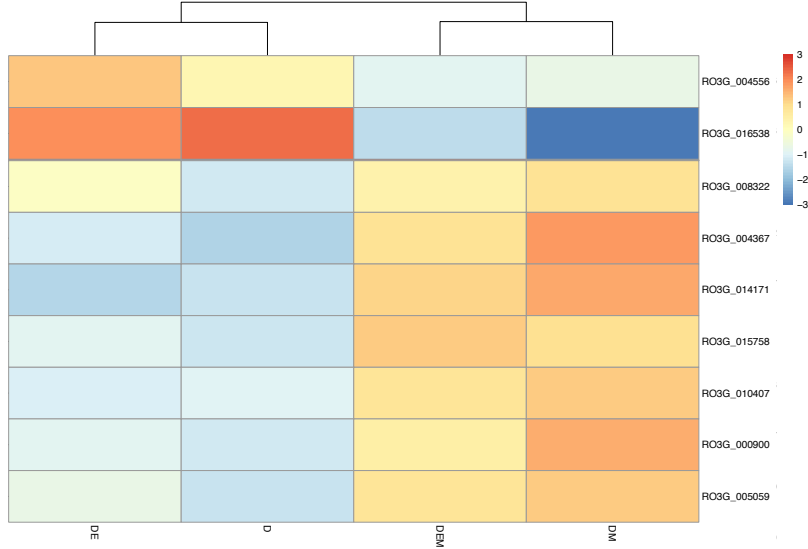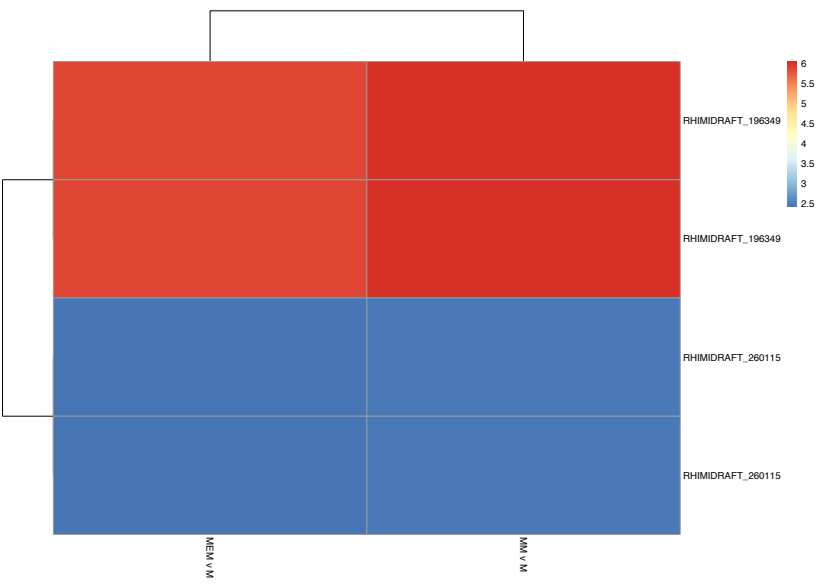

Supplement: Supplementary file [file media-4.pdf]
