# Supplementary material for: Bacterial endosymbionts influence fungal transcriptional profiles with implications for host response in the human fungal pathogens Rhizopus microsporus and Rhizopus delemar
Source: bioRxiv or medRxiv preprint supplement (doi:10.1101/580746), 2020-12-02

*R. delemar*

*R. microsporus*

SAB Control

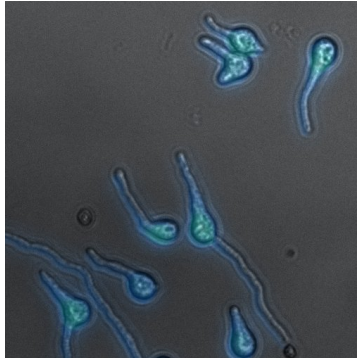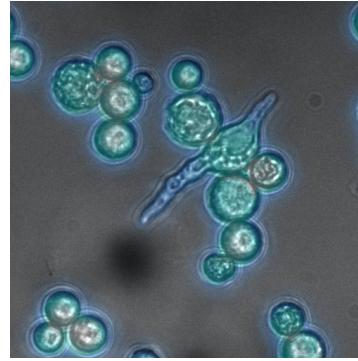

24  $\mu\text{g/ml}$   
Nikkomycin Z  
Treatment

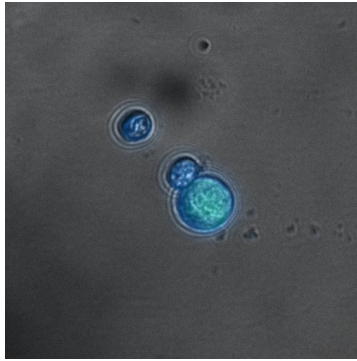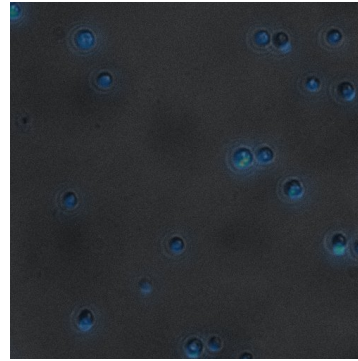

120  $\mu\text{g/ml}$   
Nikkomycin Z  
Treatment

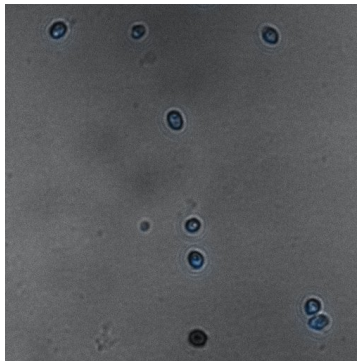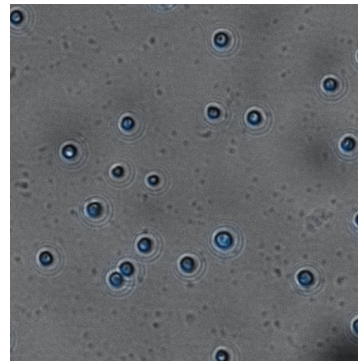

Supplement: Supplementary file [file media-5.pdf]
