# Supplementary material for: Bacterial endosymbionts influence fungal transcriptional profiles with implications for host response in the human fungal pathogens Rhizopus microsporus and Rhizopus delemar
Source: bioRxiv or medRxiv preprint supplement (doi:10.1101/580746), 2020-12-02
Supplement: Supplementary file [file media-6.pdf]

**Table S1: Selected genes differentially regulated in pairwise comparisons**

| <i>R. delemar</i>     | WT vs. Cured    | WT +<br>Macrophage<br>vs. WT | Cured +<br>Macrophage<br>vs. Cured | Annotation                             |
|-----------------------|-----------------|------------------------------|------------------------------------|----------------------------------------|
| RO3G_009519           | down >log2 fold | no change                    | no change                          | Protein phosphatase                    |
| <i>R. microsporus</i> |                 |                              |                                    |                                        |
| RHIMIDRAFT_279423     | Up >log2 fold   | down >log2 fold              | no change                          | C2H2 type zinc-finger                  |
| RHIMIDRAFT_95344      | Up >log2 fold   | down >log2 fold              | no change                          | Autophagy-related<br>C terminal domain |
| RHIMIDRAFT_292382     | no change       | down >log2 fold              | no change                          | no annotation                          |
| RHIMIDRAFT_206880     | no change       | down >log2 fold              | no change                          | no annotation                          |
| RHIMIDRAFT_199741     | no change       | down >log2 fold              | down >log2 fold                    | no annotation                          |
| RHIMIDRAFT_84646      | no change       | down >log2 fold              | no change                          | no annotation                          |
| RHIMIDRAFT_197836     | no change       | Up >log2 fold                | no change                          | no annotation                          |
| RHIMIDRAFT_84646      | Up >log2 fold   | no change                    | no change                          | no annotation                          |
