# Supplementary material for: Bacterial endosymbionts influence fungal transcriptional profiles with implications for host response in the human fungal pathogens Rhizopus microsporus and Rhizopus delemar
Source: bioRxiv or medRxiv preprint supplement (doi:10.1101/580746), 2020-12-02
Supplement: Supplementary file [file media-7.pdf]

**Supplementary Table 2** Table displaying the LogFC values for a subset of genes displayed in Figure 7. (Log2 Fold Change, FDR < 0.001).

|                 | <b>Macrophage control</b> | <b>Macrophage + <i>R. delemar</i> wt</b> | <b>Macrophage + <i>R. microsporus</i> wt</b> | <b>Macrophage + <i>R. delemar</i> cured</b> | <b>Macrophage + <i>R. microsporus</i> cured</b> |
|-----------------|---------------------------|------------------------------------------|----------------------------------------------|---------------------------------------------|-------------------------------------------------|
| <b>F3</b>       | 2.96                      | 0.195                                    | 2.11                                         | -0.593                                      | -2.99                                           |
| <b>PLA2G16</b>  | 1.96                      | 2.37                                     | 3.11                                         | 1.58                                        | -0.822                                          |
| <b>TRIM30D</b>  | 1.96                      | 2.37                                     | 3.11                                         | 1.58                                        | -0.822                                          |
| <b>SLC1A2</b>   | 1.96                      | 2.37                                     | 3.11                                         | 1.58                                        | -0.822                                          |
| <b>IL6</b>      | 1.96                      | 2.37                                     | 3.11                                         | 1.58                                        | -0.822                                          |
| <b>PSTPIP21</b> | 4.29                      | 0.781                                    | 0.786                                        | -0.00761                                    | -2.41                                           |
| <b>SAA3</b>     | 2.60                      | 0.559                                    | 0.523                                        | -1.33                                       | -0.959                                          |
| <b>ENPP4</b>    | 2.26                      | 0.118                                    | 0.430                                        | -1.74                                       | -0.522                                          |
